# Supplementary material for: Biocatalytic oxidation of flavone analogues mediated by general biocatalysts: horseradish peroxidase and laccase
Source: Royal Society of Chemistry journal article supplement (doi:10.1039/c9ra00470j), 2019-01-01

## **Biocatalytic oxidation of flavone analogues mediated by general biocatalysts: horseradish peroxidase and laccase**

Qingsong Yan,<sup>a,#</sup> Xiaoguang Tang,<sup>c,#</sup> Baojing Zhang,<sup>a</sup> Chunjie Wang,<sup>a</sup> Sa Deng,<sup>a</sup> Xiaochi Ma,<sup>a</sup> Chao Wang,<sup>a</sup> Dawei Li,<sup>b,\*</sup> Shanshan Huang,<sup>a</sup> and Peipei Dong<sup>a,\*</sup>

<sup>a</sup> College of Pharmacy, Research Institute of Integrated Traditional and Western Medicine, Dalian Medical University, Dalian 116044, P.R. China

<sup>b</sup>The First Affiliated Hospital of Dalian Medical University, No.222 Zhongshan Road, Dalian 116011, P.R. China

<sup>c</sup> Medicinal College of Chifeng University, Chifeng 02400, P.R. China

### **Supporting Information**

## List of Supporting Information

|                                                                                                                                                              |    |
|--------------------------------------------------------------------------------------------------------------------------------------------------------------|----|
| Table S1. The $^1\text{H}$ and $^{13}\text{C}$ NMR spectroscopic data of transformed products 1a, 5a, 8a and 8b ( $\delta$ in ppm, $J$ in Hz) .....          | 4  |
| Table S2. The $^1\text{H}$ and $^{13}\text{C}$ NMR spectroscopic data of transformed products 10a, 10b, 10c, 12a and 12b ( $\delta$ in ppm, $J$ in Hz) ..... | 5  |
| Figure S1. The $^1\text{H}$ NMR spectrum of 1a .....                                                                                                         | 6  |
| Figure S2. The $^{13}\text{C}$ NMR spectrum of 1a .....                                                                                                      | 6  |
| Figure S3. The HR-MS of 1a .....                                                                                                                             | 7  |
| Figure S4. The $^1\text{H}$ NMR spectrum of 5a .....                                                                                                         | 7  |
| Figure S5. The $^{13}\text{C}$ NMR spectrum of 5a .....                                                                                                      | 8  |
| Figure S6. The HR-MS of 5a .....                                                                                                                             | 8  |
| Figure S7. The $^1\text{H}$ NMR spectrum of 8a .....                                                                                                         | 9  |
| Figure S8. The $^{13}\text{C}$ NMR spectrum of 8a .....                                                                                                      | 9  |
| Figure S9. The $^1\text{H}$ NMR spectrum of 8b .....                                                                                                         | 10 |
| Figure S10. The $^{13}\text{C}$ NMR spectrum of 8b .....                                                                                                     | 10 |
| Figure S11. The $^1\text{H}$ NMR spectrum of 10a .....                                                                                                       | 11 |
| Figure S12. The $^{13}\text{C}$ NMR spectrum of 10a .....                                                                                                    | 11 |
| Figure S13. The HSQC spectrum of 10a .....                                                                                                                   | 12 |
| Figure S14. The HMBC spectrum of 10a .....                                                                                                                   | 12 |
| Figure S15. The $^1\text{H}$ - $^1\text{H}$ COSY spectrum of 10a .....                                                                                       | 13 |
| Figure S16. The NOESY spectrum of 10a .....                                                                                                                  | 13 |
| Figure S17. The HR-MS of 10a .....                                                                                                                           | 14 |
| Figure S18. The $^1\text{H}$ NMR spectrum of 10b .....                                                                                                       | 14 |
| Figure S19. The $^{13}\text{C}$ NMR spectrum of 10b .....                                                                                                    | 15 |
| Figure S20. The HSQC spectrum of 10b .....                                                                                                                   | 15 |
| Figure S21. The HMBC spectrum of 10b .....                                                                                                                   | 16 |
| Figure S22. The $^1\text{H}$ - $^1\text{H}$ COSY spectrum of 10b .....                                                                                       | 16 |
| Figure S23. The NOESY spectrum of 10b .....                                                                                                                  | 17 |
| Figure S24. The $^1\text{H}$ NMR spectrum of 10c .....                                                                                                       | 17 |
| Figure S25. The $^{13}\text{C}$ NMR spectrum of 10c .....                                                                                                    | 18 |
| Figure S26. The HSQC spectrum of 10c .....                                                                                                                   | 18 |
| Figure S27. The HMBC spectrum of 10c .....                                                                                                                   | 19 |
| Figure S28. The $^1\text{H}$ - $^1\text{H}$ COSY spectrum of 10c .....                                                                                       | 19 |
| Figure S29. The NOESY spectrum of 10c .....                                                                                                                  | 20 |
| Figure S30. The HR-MS of 10c .....                                                                                                                           | 20 |
| Figure S31. The $^1\text{H}$ -NMR spectrum of 12a .....                                                                                                      | 21 |
| Figure S32. The $^{13}\text{C}$ NMR spectrum of 12a .....                                                                                                    | 21 |
| Figure S33. The HR-MS of 12a .....                                                                                                                           | 22 |
| Figure S34. $^1\text{H}$ NMR spectrum of 12b .....                                                                                                           | 22 |
| Figure S35. The $^{13}\text{C}$ NMR spectrum of 12b .....                                                                                                    | 23 |
| Figure S36. The HSQC spectrum of 12b .....                                                                                                                   | 23 |
| Figure S37. The HMBC spectrum of 12b .....                                                                                                                   | 24 |
| Figure S38. The $^1\text{H}$ - $^1\text{H}$ COSY spectrum of 12b .....                                                                                       | 24 |
| Figure S39. The NOESY spectrum of 12b .....                                                                                                                  | 25 |

**Figure S40. The HR-MS of 12b** .....25

**Table S1. The  $^1\text{H}$  and  $^{13}\text{C}$  NMR spectroscopic data of transformed products **1a**, **5a**, **8a** and **8b** ( $\delta$  in ppm,  $J$  in Hz)**

| No.  | <b>1a<sup>a</sup></b> |                     | <b>5a<sup>a</sup></b> |                     | <b>8a<sup>a</sup></b>                       |                     | <b>8b<sup>b</sup></b> |                     |
|------|-----------------------|---------------------|-----------------------|---------------------|---------------------------------------------|---------------------|-----------------------|---------------------|
|      | $\delta_{\text{H}}$   | $\delta_{\text{C}}$ | $\delta_{\text{H}}$   | $\delta_{\text{C}}$ | $\delta_{\text{H}}$                         | $\delta_{\text{C}}$ | $\delta_{\text{H}}$   | $\delta_{\text{C}}$ |
| 1-2  |                       | 159.3               |                       | 191.7               | 5.41 dd (13.0, 2.5)                         | 80.4                | 5.53 dd (13.0, 2.5)   | 77.9                |
| 3    |                       | 132.5               |                       | 105.8               | 3.16 dd (17.0, 13.0)<br>2.77 dd (17.0, 2.5) | 40.5                | 3.23-3.27 m           | 42.0                |
| 4    |                       | 182.8               |                       | 193.3               |                                             | 197.8               |                       | 196.0               |
| 5    |                       | 164.8               |                       | 171.3               |                                             | 165.5               |                       | 163.4               |
| 6    | 6.13 s                | 94.9                | 5.95 d (1.5)          | 97.9                | 5.92 d (1.5)                                | 97.1                | 5.90 m                | 95.8                |
| 7    |                       | 166.0               |                       | 174.0               |                                             | 168.3               |                       | 166.7               |
| 8    | 6.41 s                | 100.16              | 5.98 d (1.5)          | 92.1                | 5.88 d (1.5)                                | 96.2                | 5.90 m                | 95.0                |
| 9    |                       | 160.9               |                       | 160.4               |                                             | 164.9               |                       | 162.7               |
| 10   |                       | 105.1               |                       | 102.1               |                                             | 103.4               |                       | 101.7               |
| 1'   |                       | 122.4               |                       | 126.3               |                                             | 131.3               |                       | 132.1               |
| 2'   | 7.32 d (8.0)          | 131.8               | 8.04 d (9.0)          | 134.2               | 7.37 s                                      | 128.2               | 7.19 d (1.5)          | 124.4               |
| 3'   | 6.66 d (8.0)          | 116.1               | 6.81 d (9.0)          | 116.0               |                                             | 131.8               |                       | 120.9               |
| 4'   |                       | 163.2               |                       | 164.4               |                                             | 155.8               |                       | 157.7               |
| 5'   | 6.66 d (8.0)          | 116.1               | 6.81 d (9.0)          | 116.0               | 6.97 d (8.5)                                | 117.4               | 7.03 d (8.5)          | 115.8               |
| 6'   | 7.32 d (8.0)          | 131.8               | 8.04 d (9.0)          | 134.2               | 7.36 d (8.5)                                | 131.2               | 7.23 dd (8.15, 1.5)   | 128.3               |
| II-2 |                       | 159.4               |                       |                     | 5.41 dd (13.0, 2.5)                         | 80.4                | 5.47 dd (13.0, 3.0)   | 18.0                |
| 3    | 6.41 s                | 117.6               |                       |                     | 3.16 dd (17.0, 13.0)<br>2.77 dd (17.0, 2.5) | 40.5                | 2.70-2.72 m           | 42.0                |
| 4    |                       | 183.8               |                       |                     |                                             | 197.8               |                       | 196.1               |
| 5    |                       | 165.8               |                       |                     |                                             | 165.5               |                       | 163.4               |
| 6    | 6.22 s                | 95.2                |                       |                     | 5.92 d (1.5)                                | 97.1                | 5.90 m                | 95.8                |
| 7    |                       | 166.1               |                       |                     |                                             | 168.3               |                       | 166.7               |
| 8    | 6.34 s                | 100.2               |                       |                     | 5.88 d (1.5)                                | 96.2                |                       | 113.7               |
| 9    |                       | 161.2               |                       |                     |                                             | 164.9               |                       | 162.7               |
| 10   |                       | 105.3               |                       |                     |                                             | 103.4               |                       | 101.7               |
| 1'   |                       | 123.7               |                       |                     |                                             | 131.3               |                       | 130.1               |
| 2'   | 7.73 s                | 129.3               |                       |                     | 7.37 s                                      | 128.2               | 7.46 d (8.5)          | 128.3               |
| 3'   |                       | 117.6               |                       |                     |                                             | 131.8               | 6.89 d (8.5)          | 116.1               |
| 4'   |                       | 163.4               |                       |                     |                                             | 155.8               |                       | 157.9               |
| 5'   | 6.94 d (7.0)          | 165.8               |                       |                     | 6.97 d (8.5)                                | 117.4               | 7.46 d (8.5)          | 116.1               |
| 6'   | 7.77 d (7.0)          | 125.0               |                       |                     | 7.36 d (8.5)                                | 131.2               | 6.89 d (8.5)          | 128.3               |

<sup>a</sup> The  $^1\text{H}$ -NMR (500 MHz) and  $^{13}\text{C}$ -NMR (125 MHz) spectroscopic data of compounds **1a**, **5a**, **8a** were measured in methanol- $d_4$ . <sup>b</sup> The  $^1\text{H}$ -NMR (500 MHz) and  $^{13}\text{C}$ -NMR (125 MHz) spectroscopic data of compound **8b** was measured in DMSO- $d_6$ .

**Table S2. The  $^1\text{H}$  and  $^{13}\text{C}$  NMR spectroscopic data of transformed products 10a, 10b, 10c, 12a and 12b ( $\delta$  in ppm,  $J$  in Hz)**

| No.  | 10a                   |                     | 10b                   |                     | 10c                                              |                     | 12a                 |                     | 12b                 |                        |   |       |
|------|-----------------------|---------------------|-----------------------|---------------------|--------------------------------------------------|---------------------|---------------------|---------------------|---------------------|------------------------|---|-------|
|      | $\delta_{\text{H}}$   | $\delta_{\text{C}}$ | $\delta_{\text{H}}$   | $\delta_{\text{C}}$ | $\delta_{\text{H}}$                              | $\delta_{\text{C}}$ | $\delta_{\text{H}}$ | $\delta_{\text{C}}$ | $\delta_{\text{H}}$ | $\delta_{\text{C}}$    |   |       |
| I-2  | 8.19 s                | 155.1               | 8.15 s                | 155.2               | 8.31 s                                           | 155.6               | 5.86<br>(11.5)      | d                   | 85.5                | 5.29<br>(10.0)         | d | 84.6  |
| 3    |                       | 125.5               |                       | 125.4               |                                                  | 120.1               | 2.67<br>(11.5)      | d                   | 52.5                | 3.17 dd<br>(10.0, 3.0) |   | 52.2  |
| 4    |                       | 177.9               |                       | 177.9               |                                                  | 174.43              |                     |                     | 193.6               |                        |   | 192.6 |
| 5    | 8.06 d (9.0)          | 128.5               | 8.04 d (8.5)          | 128.3               | 7.92 d (8.5)                                     | 126.9               | 7.68 d (9.0)        |                     | 130.0               | 7.43 d (8.5)           |   | 129.9 |
| 6    | 6.96 dd<br>(9.0, 2.5) | 116.6               | 6.93 dd<br>(8.5, 2.5) | 116.5               | 6.91 m                                           | 115.2               | 6.49 d (9.0)        |                     | 111.7               | 6.39 dd<br>(8.5, 2.0)  |   | 111.6 |
| 7    |                       | 164.7               |                       | 164.7               |                                                  | 162.9               |                     |                     | 166.6               |                        |   | 166.6 |
| 8    | 6.87 d (2.5)          | 103.3               | 6.85 d (2.5)          | 103.3               | 6.88 d (2.0)                                     | 102.0               | 6.26 brs            |                     | 103.6               | 6.22 d (2.0)           |   | 103.5 |
| 9    |                       | 159.8               |                       | 159.8               |                                                  | 157.3               |                     |                     | 165.0               |                        |   | 164.2 |
| 10   |                       | 118.2               |                       | 118.1               |                                                  | 146.5               |                     |                     | 115.2               |                        |   | 115.5 |
| 1'   |                       | 128.3               |                       | 127.7               |                                                  | 49.9                |                     |                     | 129.5               |                        |   | 129.4 |
| 2'   | 7.51 d (8.5)          | 131.5               | 7.62 d (2.0)          | 127.3               | 7.40 brs                                         | 83.8                | 6.90<br>(8.5)       | brd                 | 130.2               | 6.92 d (8.5)           |   | 130.3 |
| 3'   | 7.21 d (8.5)          | 118.2               |                       | 126.9               |                                                  | 38.0                | 6.76<br>(8.5)       | brd                 | 116.4               | 6.67 d (8.5)           |   | 116.2 |
| 4'   |                       | 158.1               |                       | 160.2               |                                                  | 195.5               |                     |                     | 159.4               |                        |   | 159.0 |
| 5'   | 7.21 d (8.5)          | 118.2               | 7.07 d (8.0)          | 111.6               | 6.90 m                                           | 126.5               | 6.76<br>(8.5)       | brd                 | 116.4               | 6.67 d (8.5)           |   | 116.2 |
| 6'   | 7.51 d (8.5)          | 131.5               | 7.48 dd<br>(8.0, 2.0) | 133.3               | 7.40 dd<br>(8.0, 1.5)                            | 145.2               | 6.90<br>(8.5)       | brd                 | 130.2               | 6.92 d (8.5)           |   | 130.3 |
| II-2 | 6.25 s                | 104.9               | 6.32 s                | 87.5                | 8.16 s                                           | 155.6               | 5.86<br>(11.5)      | d                   | 85.5                | 5.55 d (5.0)           |   | 82.4  |
| 3    | 7.37 s                | 78.4                |                       | 90.0                |                                                  | 120.1               | 2.67<br>(11.5)      | d                   | 52.5                | 2.94 dd<br>(5.0, 3.0)  |   | 50.5  |
| 4    |                       | 189.6               |                       | 189.1               |                                                  | 174.43              |                     |                     | 193.6               |                        |   | 194.9 |
| 5    | 7.79 d (8.5)          | 129.5               | 7.66 d (8.5)          | 130.7               | 7.82 d (8.5)                                     | 126.9               | 7.68 d (9.0)        |                     | 130.0               | 7.61 d (8.5)           |   | 130.0 |
| 6    | 6.56 d (8.5,<br>2.5)  | 112.3               | 6.53 dd (8.5,<br>2.5) | 113.0               | 6.91 m                                           | 115.2               | 6.49 d (9.0)        |                     | 111.7               | 6.49 dd<br>(8.5, 2.0)  |   | 111.7 |
| 7    | 7.79                  | 167.1               |                       | 167.9               |                                                  | 162.9               |                     |                     | 166.6               |                        |   | 166.3 |
| 8    | 6.247 d (2.5)         | 104.5               | 6.46 d (2.5)          | 104.3               | 6.84 d (2.0)                                     | 102.0               | 6.26 brs            |                     | 103.6               | 6.45 d (2.0)           |   | 103.9 |
| 9    | 7.79                  | 159.7               |                       | 163.1               |                                                  | 157.3               |                     |                     | 165.0               |                        |   | 166.0 |
| 10   |                       | 115.3               |                       | 114.3               |                                                  | 146.5               |                     |                     | 115.2               |                        |   | 116.9 |
| 1'   | 6.75                  | 130.0               |                       | 129.8               |                                                  | 49.9                |                     |                     | 129.5               |                        |   | 129.3 |
| 2'   | 7.37 d (8.5)          | 129.3               | 7.39 d (9.0)          | 128.0               | 5.44 m                                           | 83.8                | 6.90<br>(8.5)       | brd                 | 130.2               | 7.09 d (8.5)           |   | 128.4 |
| 3'   | 6.75 d (8.5)          | 116.3               | 6.79 d (9.0)          | 116.4               | 3.08 dd<br>(17.5, 4.0)<br>2.79 dd<br>(17.5, 2.5) | 38.0                | 6.76<br>(8.5)       | brd                 | 116.4               | 6.79 d (8.5)           |   | 116.4 |
| 4'   |                       | 159.1               |                       | 159.1               |                                                  | 195.5               |                     |                     | 159.4               |                        |   | 158.5 |
| 5'   | 6.75 d (8.5)          | 116.3               | 6.79 d (9.0)          | 116.4               | 6.04 d<br>(10.0)                                 | 126.5               | 6.76<br>(8.5)       | brd                 | 116.4               | 6.79 d (8.5)           |   | 116.4 |
| 6'   | 7.37 d (8.5)          | 129.3               | 7.39 d (9.0)          | 128.0               | 6.80 dd<br>(10.0, 2.0)                           | 145.2               | 6.90<br>(8.5)       | brd                 | 130.2               | 7.09 d (8.5)           |   | 128.4 |

<sup>a</sup> The  $^1\text{H}$ -NMR (500 MHz) and  $^{13}\text{C}$ -NMR (125 MHz) spectroscopic data of compounds **10a**, **10b**, **10c** were measured in  $\text{DMSO}-d_6$ . <sup>b</sup> The  $^1\text{H}$ -NMR (500 MHz) and  $^{13}\text{C}$ -NMR (125 MHz) spectroscopic data of compound **12a**, **12b** was measured in  $\text{methanol}-d_4$ .

**Figure S1. The  $^1\text{H}$  NMR spectrum of 1a**

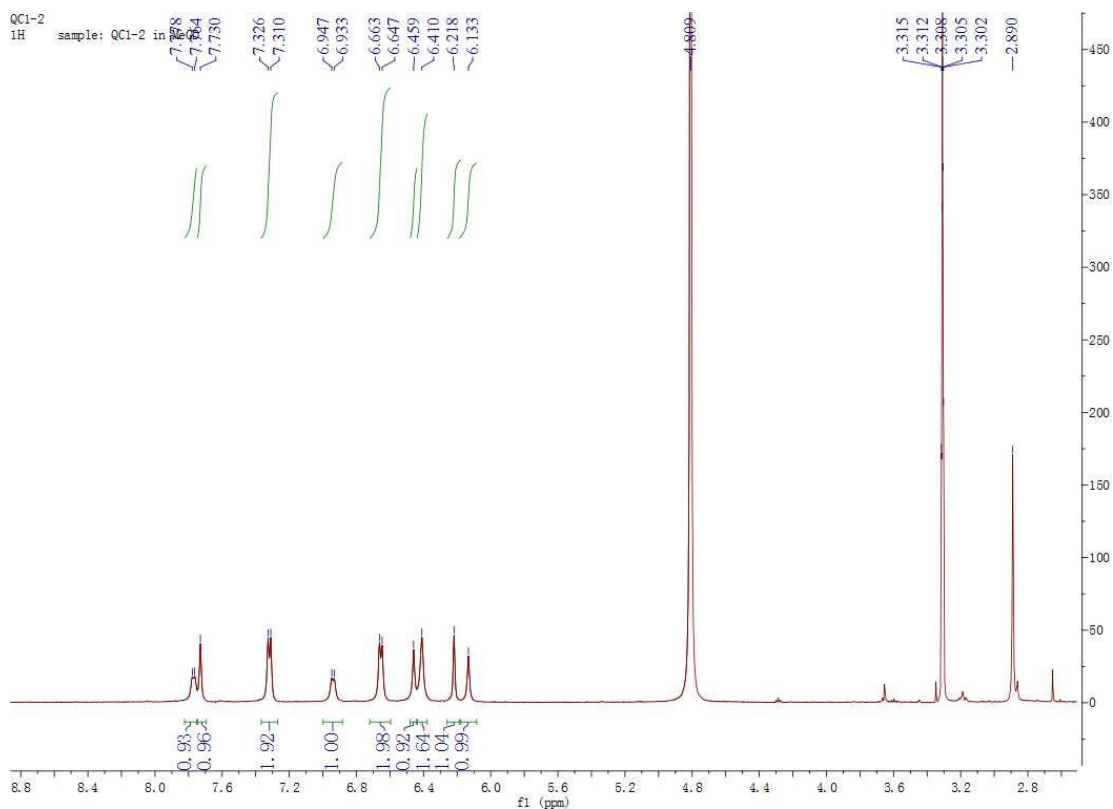

**Figure S2. The  $^{13}\text{C}$  NMR spectrum of 1a**

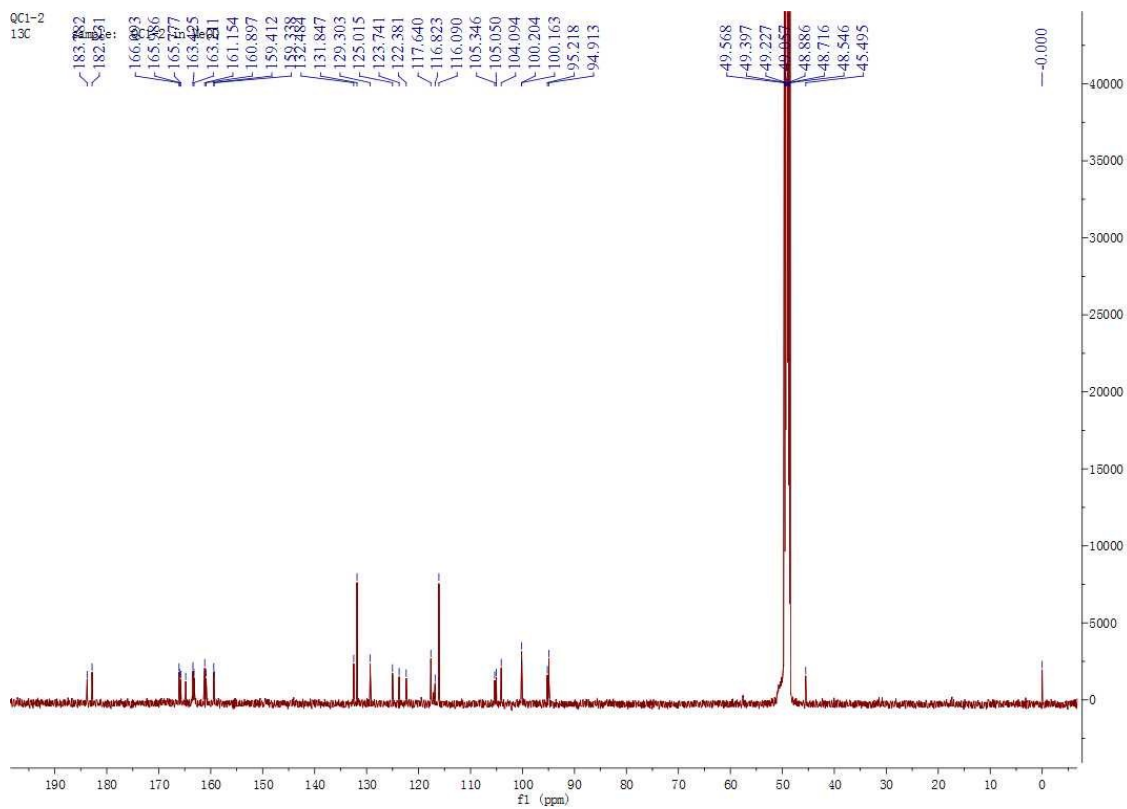

**Figure S3. The HR-MS of 1a**

20161206-QC1-2 #10-11 RT: 0.10-0.10 AV: 2 SB: 3 0.52-0.54 NL: 2.04E5  
T: FTMS + p ESI Full ms [150.00-1200.00]

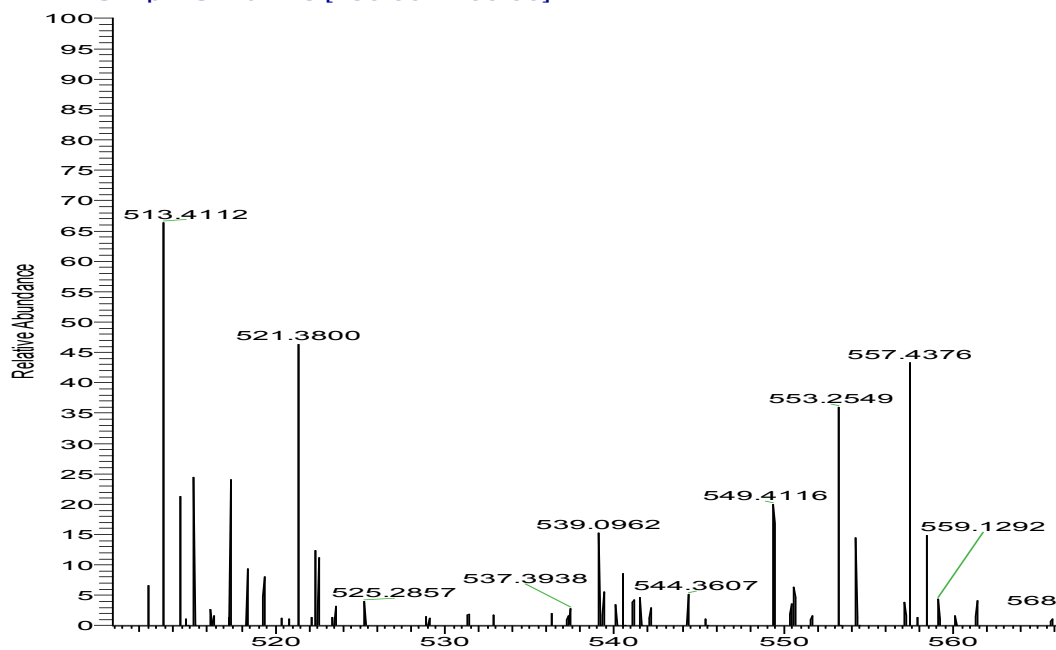

**Figure S4. The <sup>1</sup>H NMR spectrum of 5a**

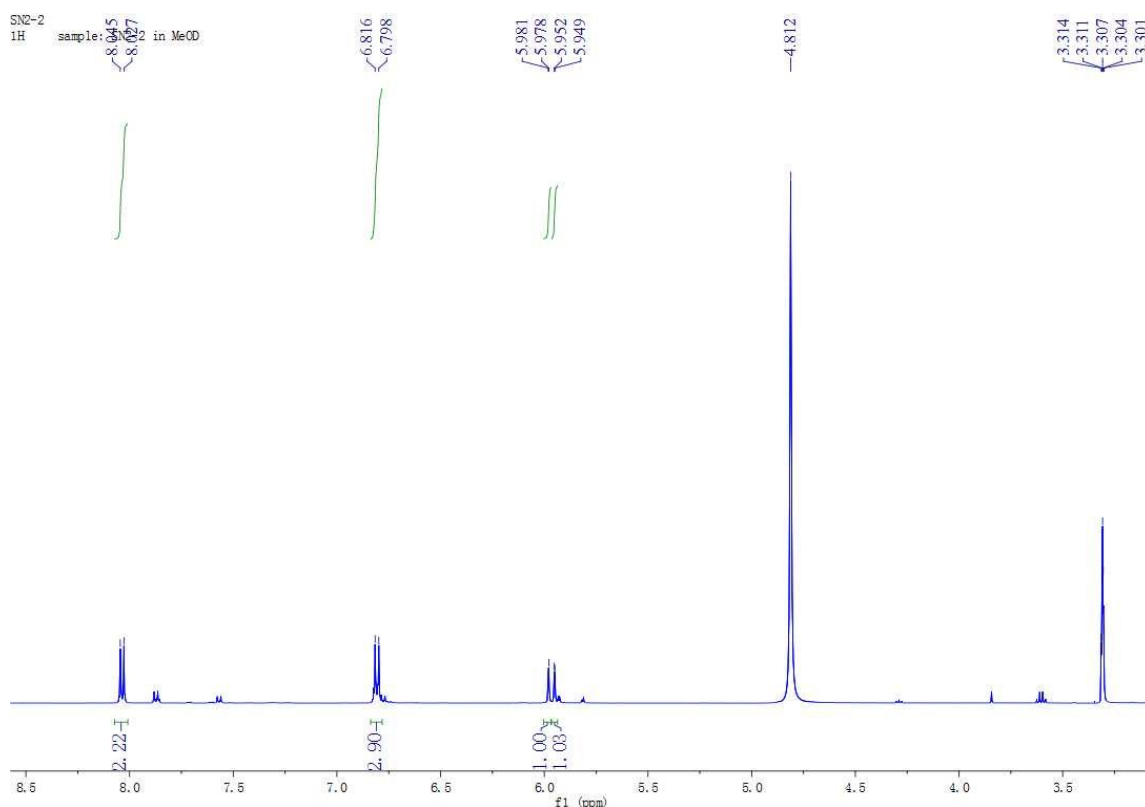

**Figure S5. The  $^{13}\text{C}$  NMR spectrum of 5a**

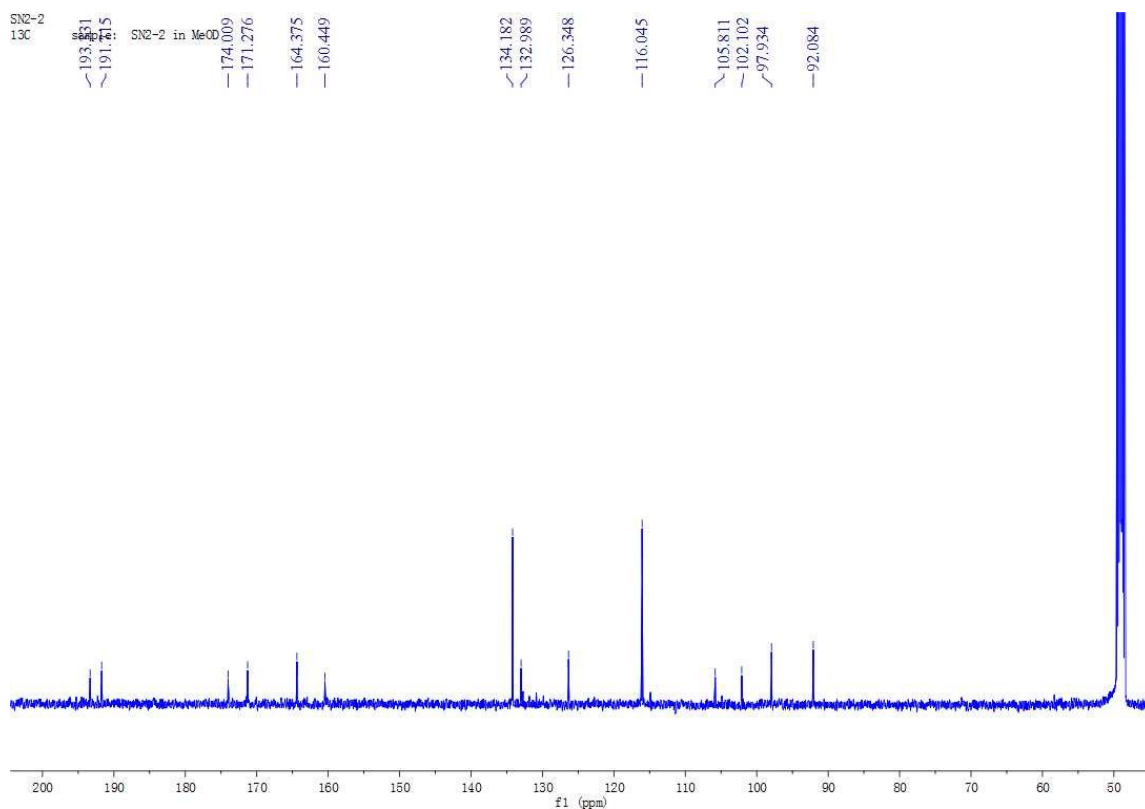

**Figure S6. The HR-MS of 5a**

20161206-SN2-2 #9-11 RT: 0.09-0.10 AV: 3 SB: 3 0.94-0.96 NL: 3.9  
T: FTMS + p ESI Full ms [150.00-1200.00]

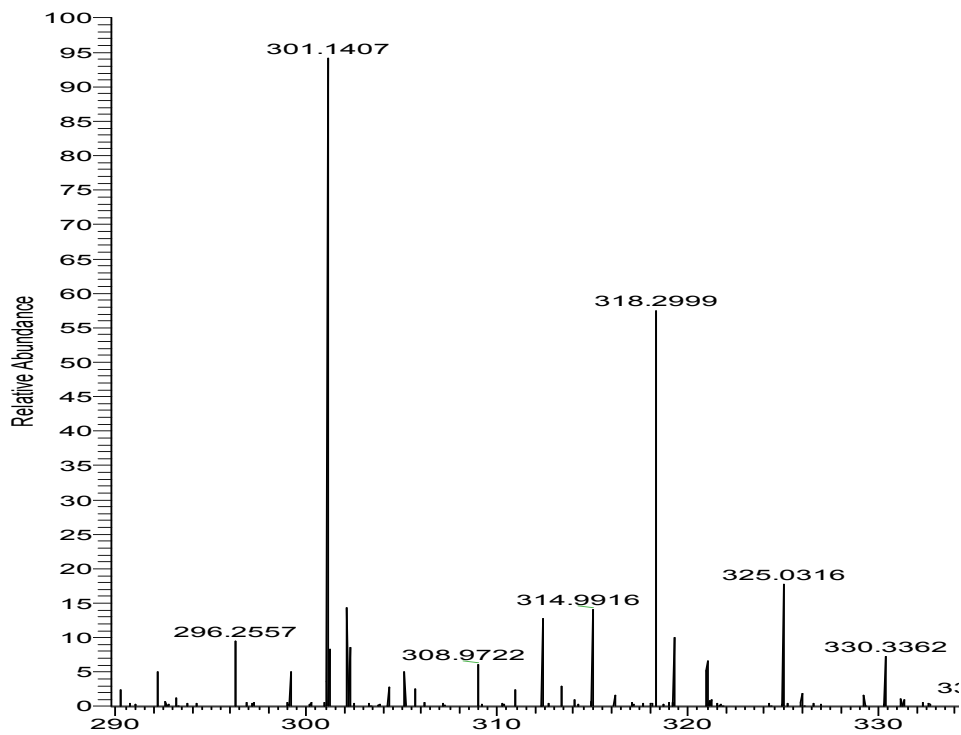



Figure S7. The  $^1\text{H}$  NMR spectrum of **8a**

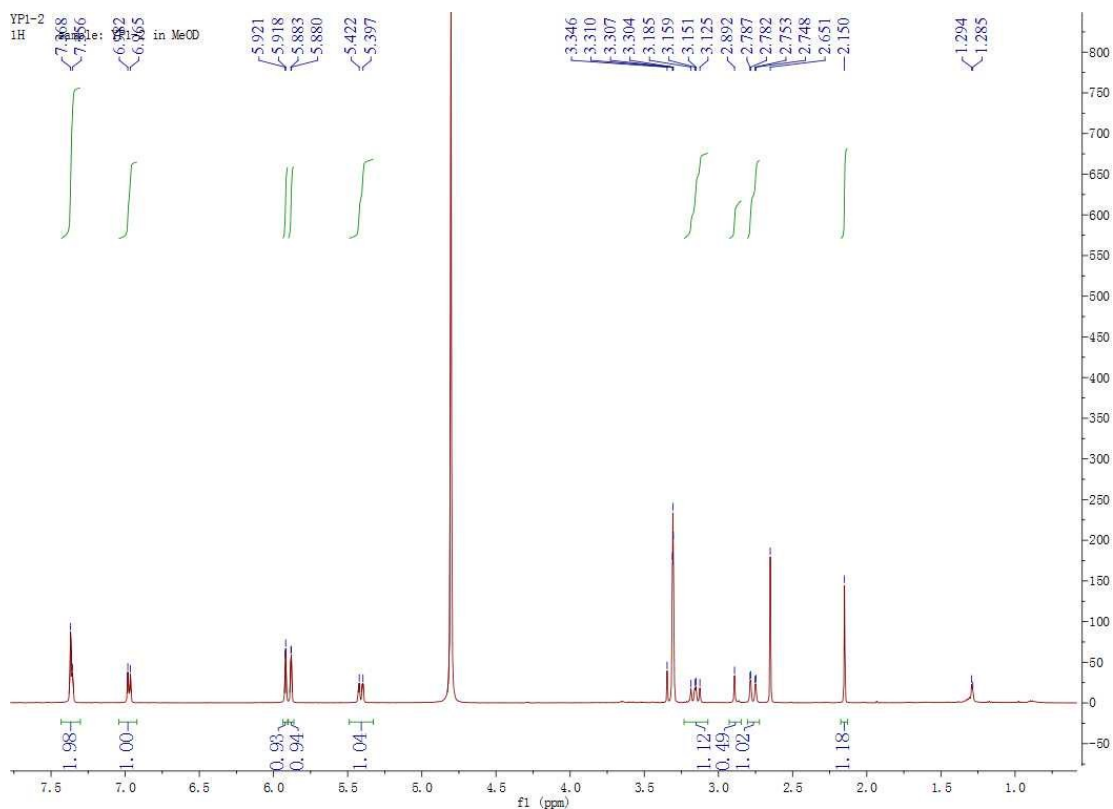

Figure S8. The  $^{13}\text{C}$  NMR spectrum of **8a**

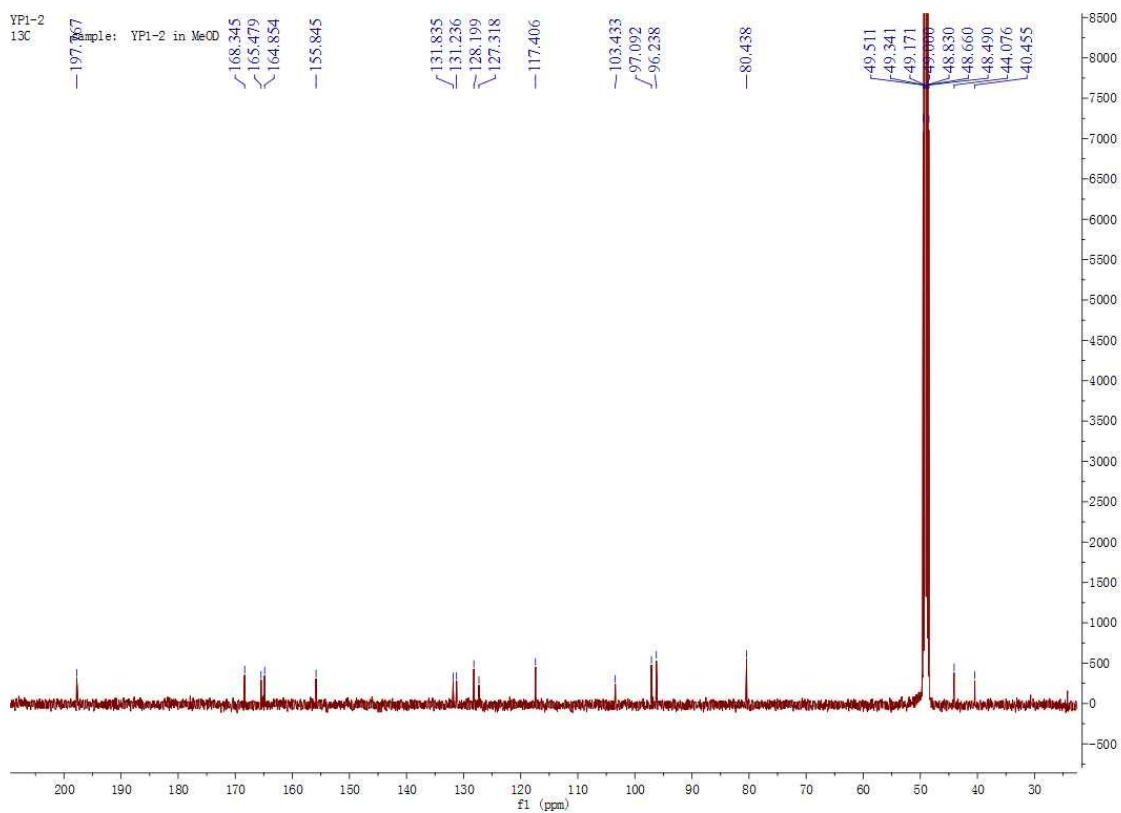

**Figure S9. The  $^1\text{H}$  NMR spectrum of 8b**

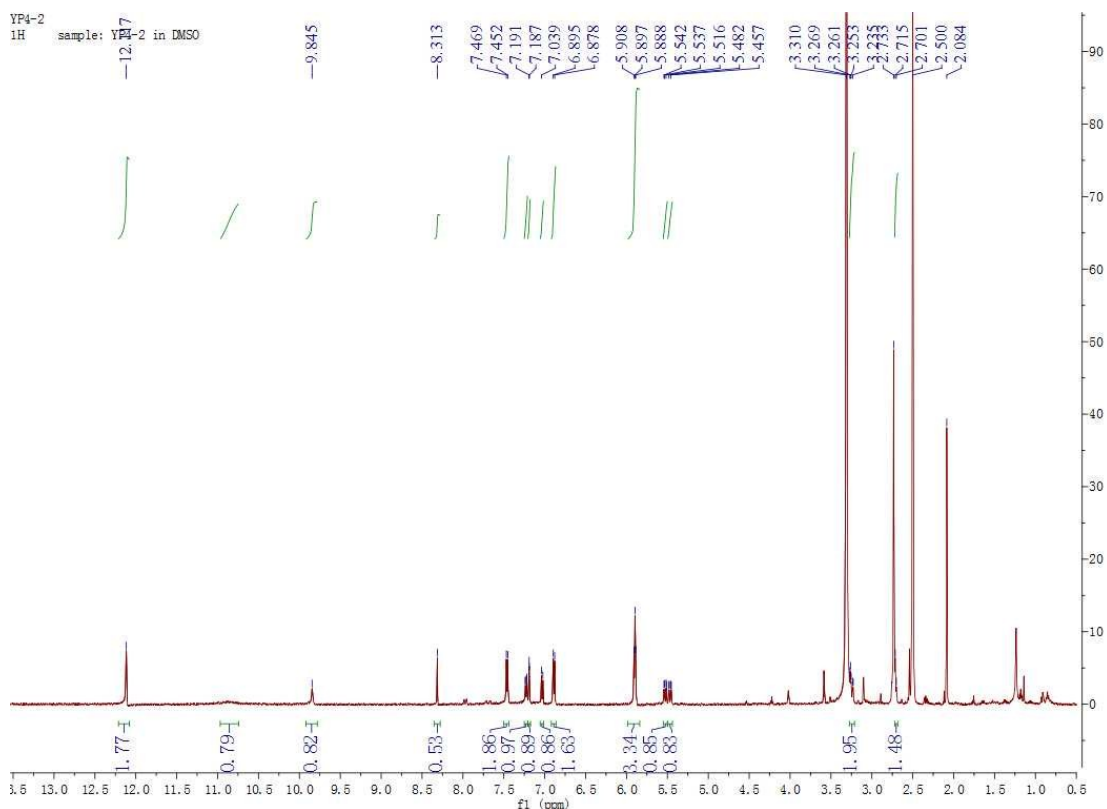

**Figure S10. The  $^{13}\text{C}$  NMR spectrum of 8b**

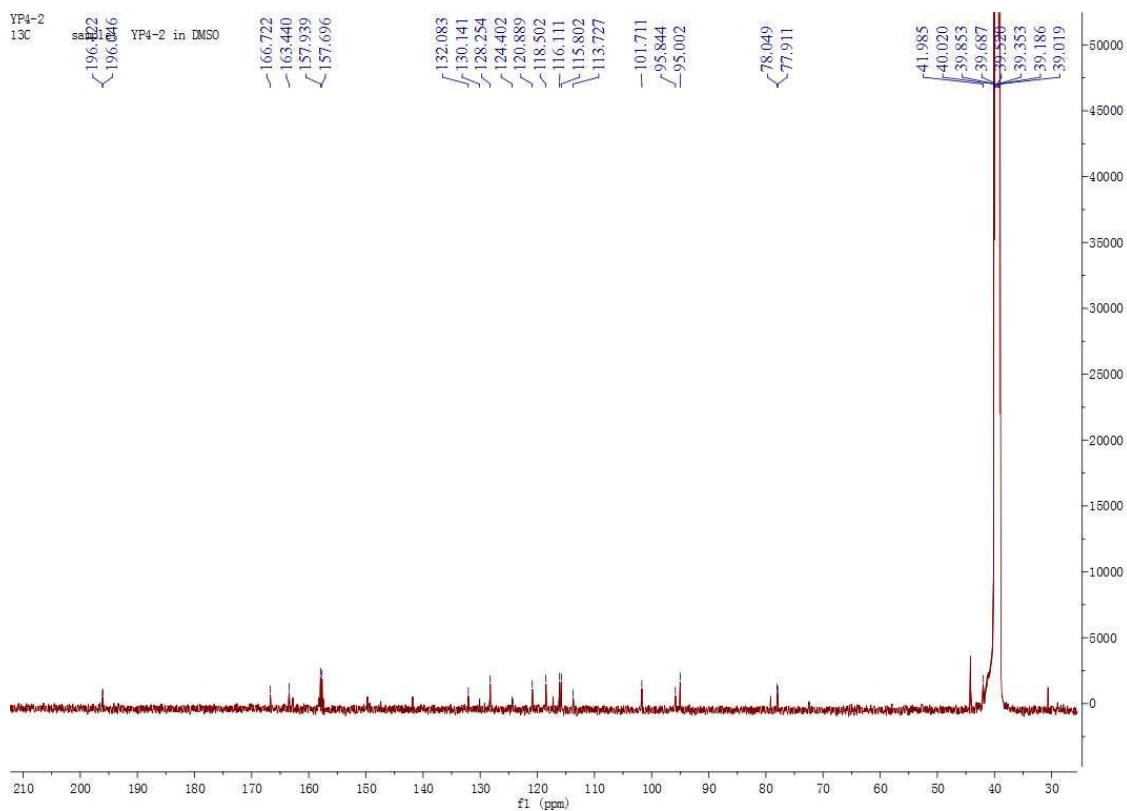

**Figure S11. The  $^1\text{H}$  NMR spectrum of 10a**

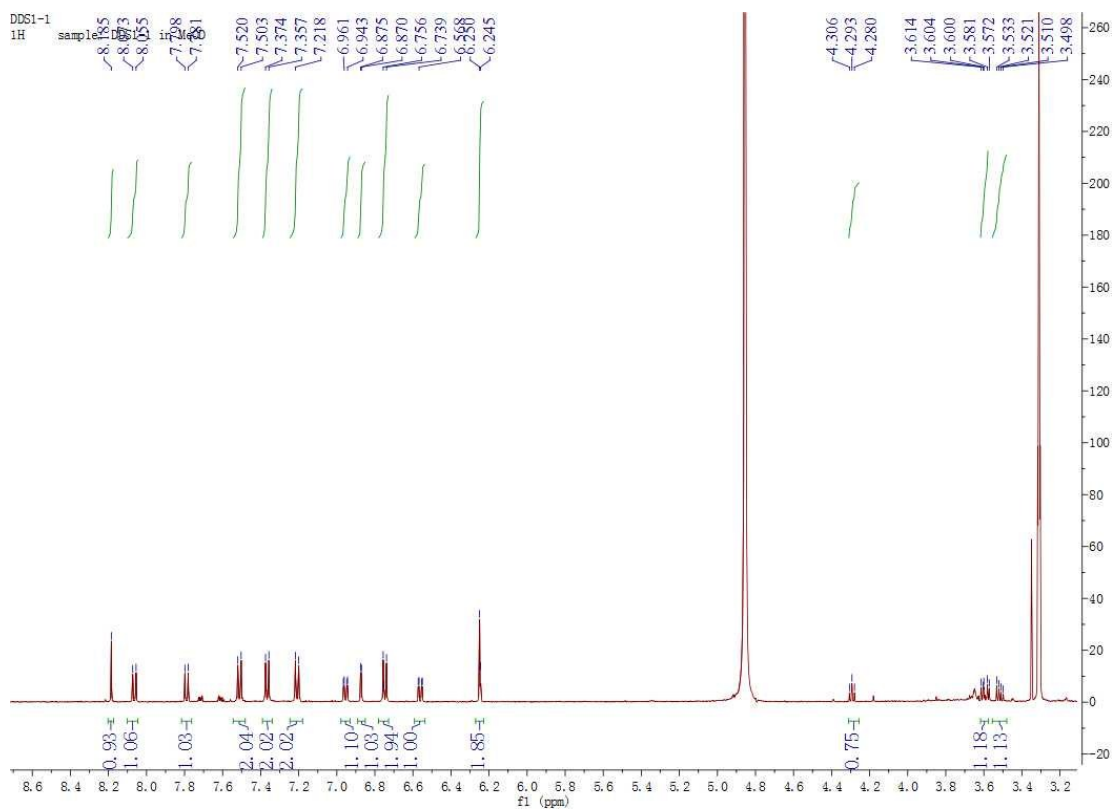

**Figure S12. The  $^{13}\text{C}$  NMR spectrum of 10a**

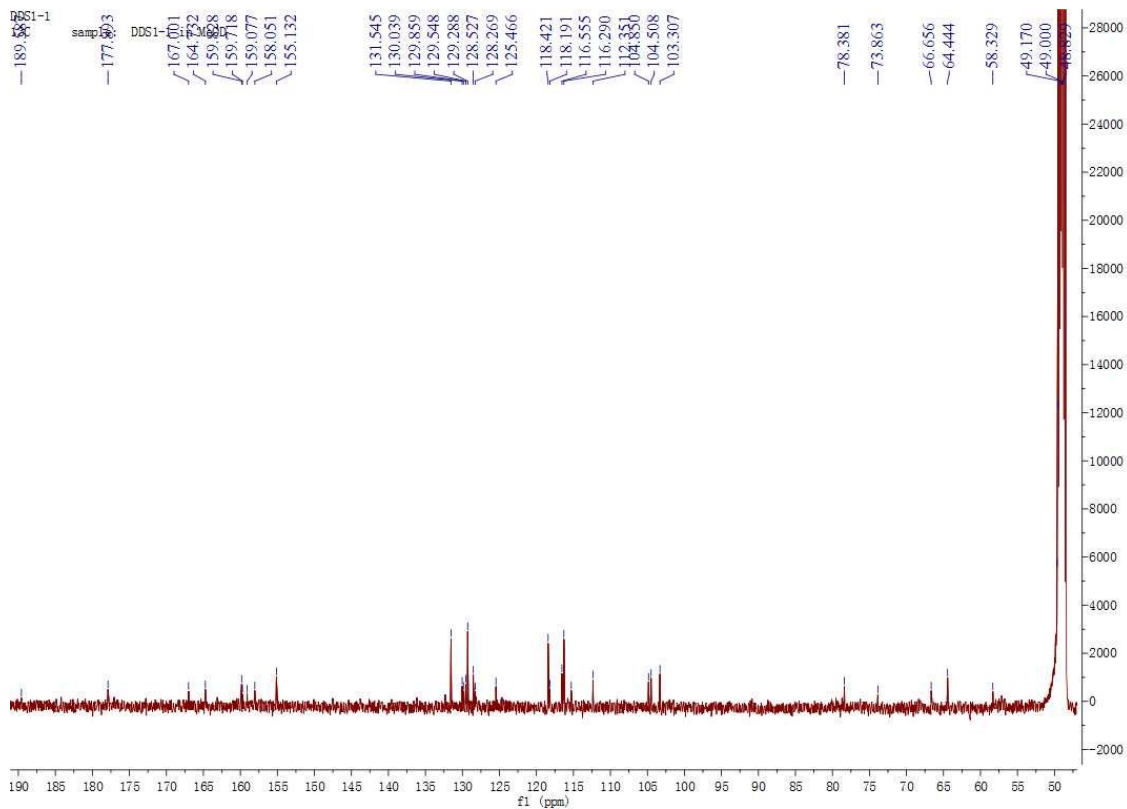

Figure S13. The HSQC spectrum of 10a

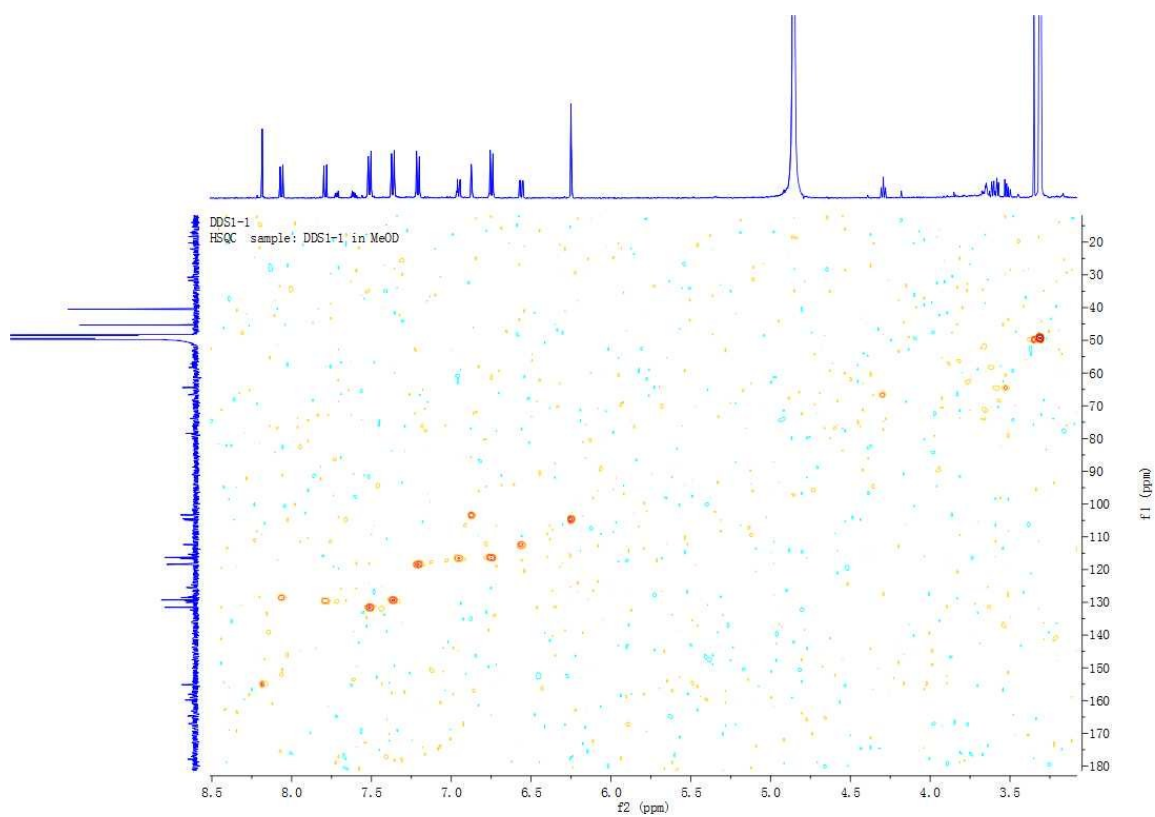

Figure S14. The HMBC spectrum of 10a

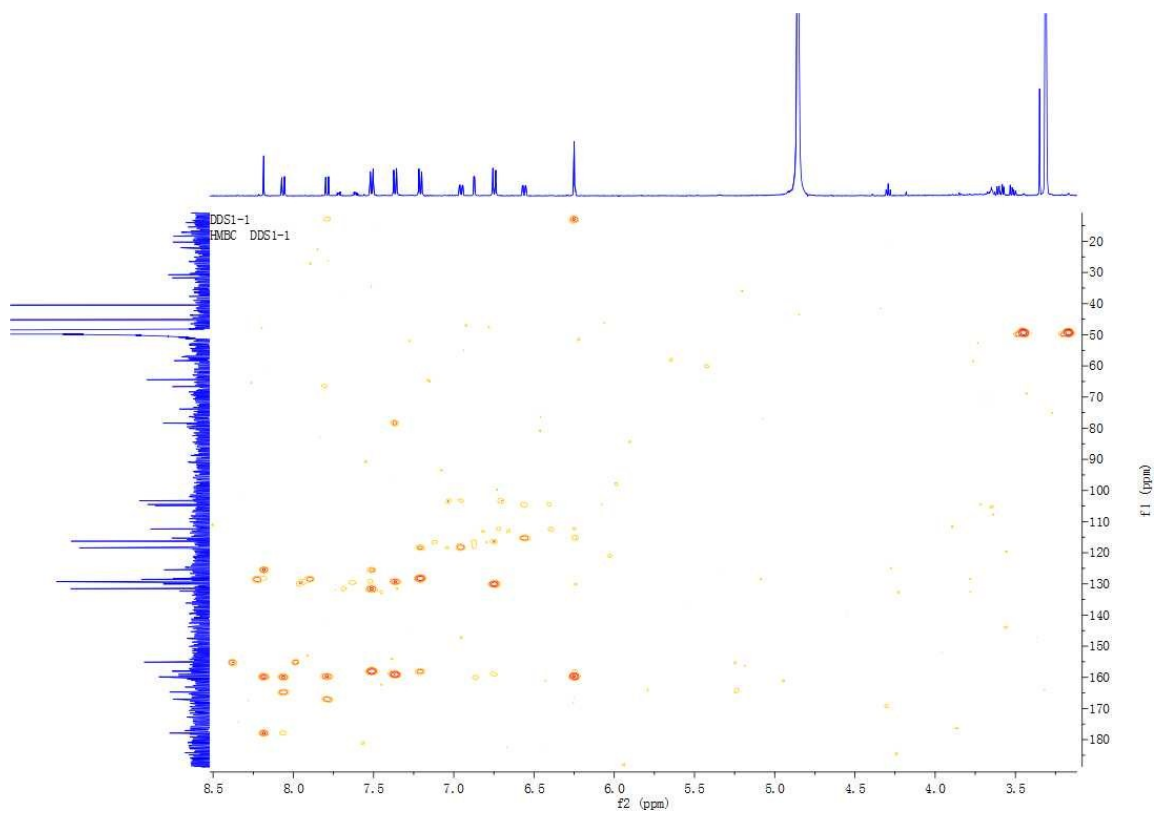

**Figure S15. The  $^1\text{H}$ - $^1\text{H}$  COSY spectrum of 10a**

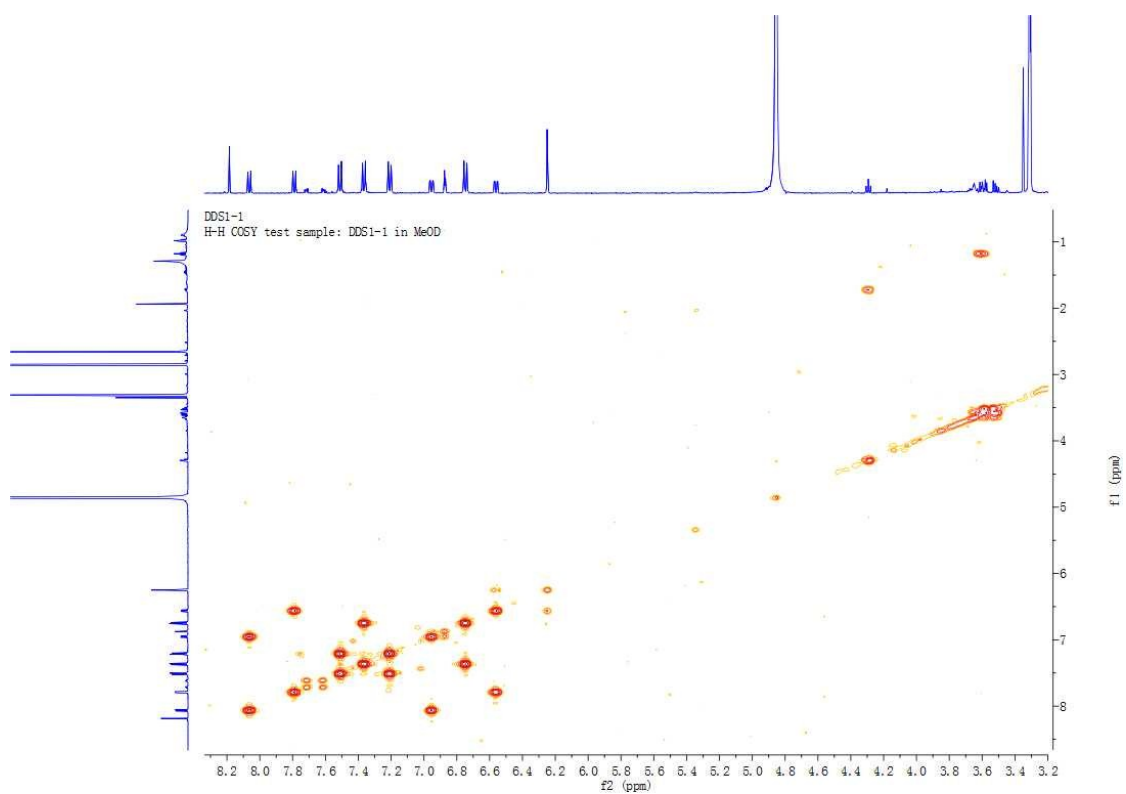

**Figure S16. The NOESY spectrum of 10a**

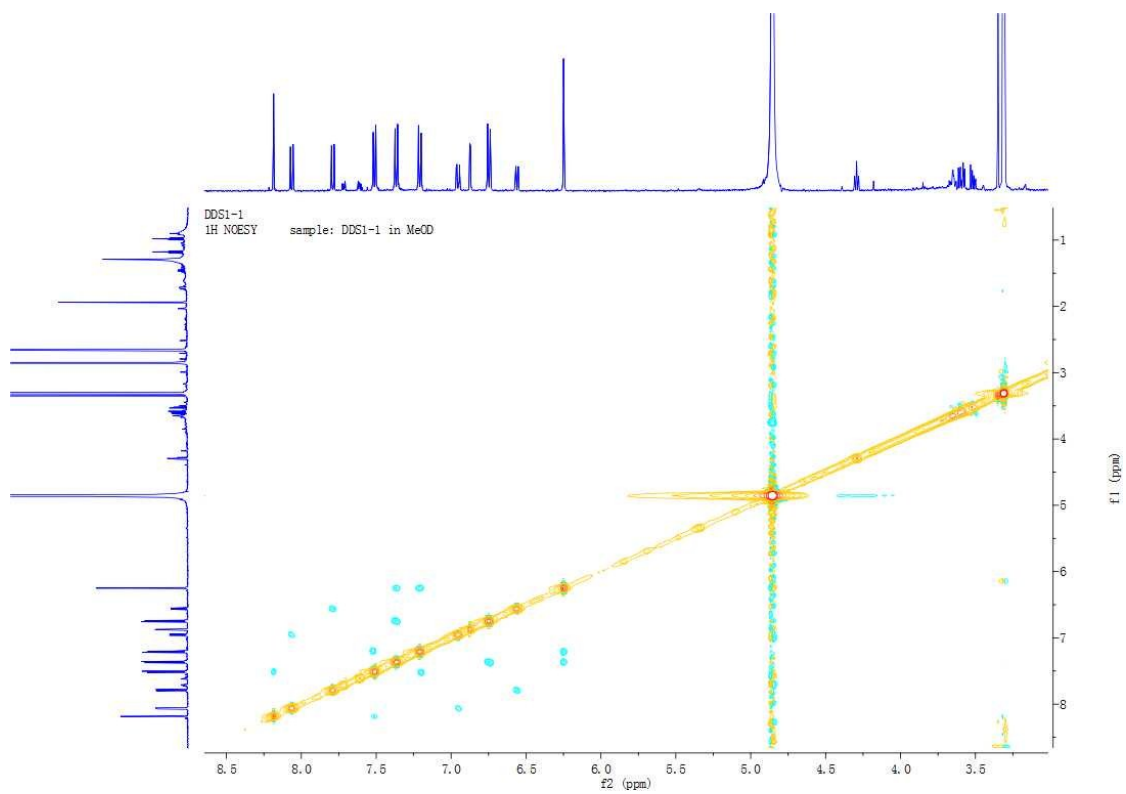

**Figure S17. The HR-MS of 10a**

20161206-DDS1-2-#9-10 RT: 0.09-0.10 AV: 2 SB: 2 0.03-0.04 NL: 3.89E6  
T: FTMS + p-ESI Full ms [150.00-1200.00]

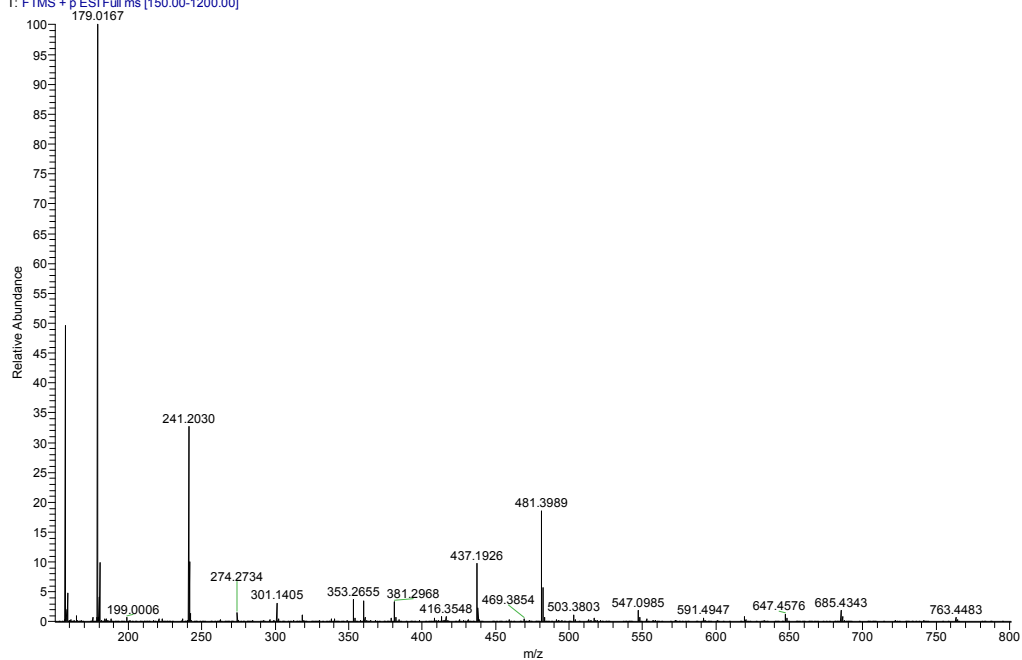

**Figure S18. The  $^1\text{H}$  NMR spectrum of 10b**

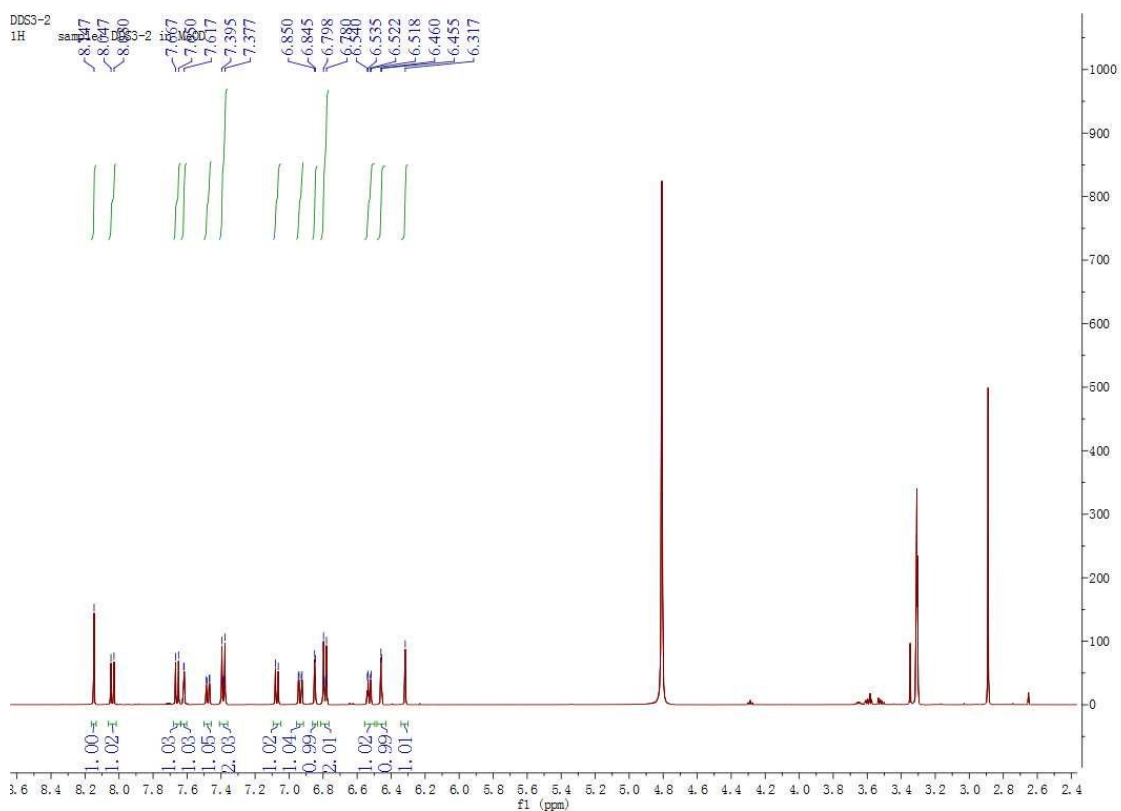

**Figure S19. The  $^{13}\text{C}$  NMR spectrum of 10b**

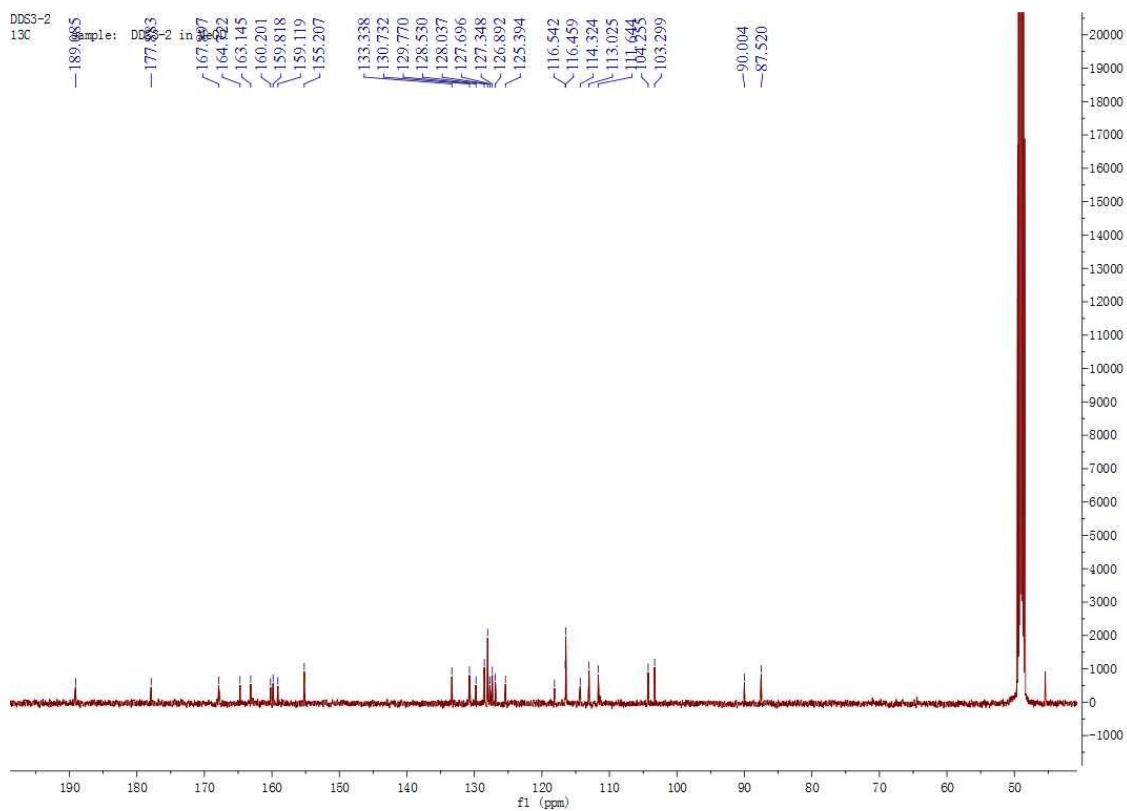

**Figure S20. The HSQC spectrum of 10b**

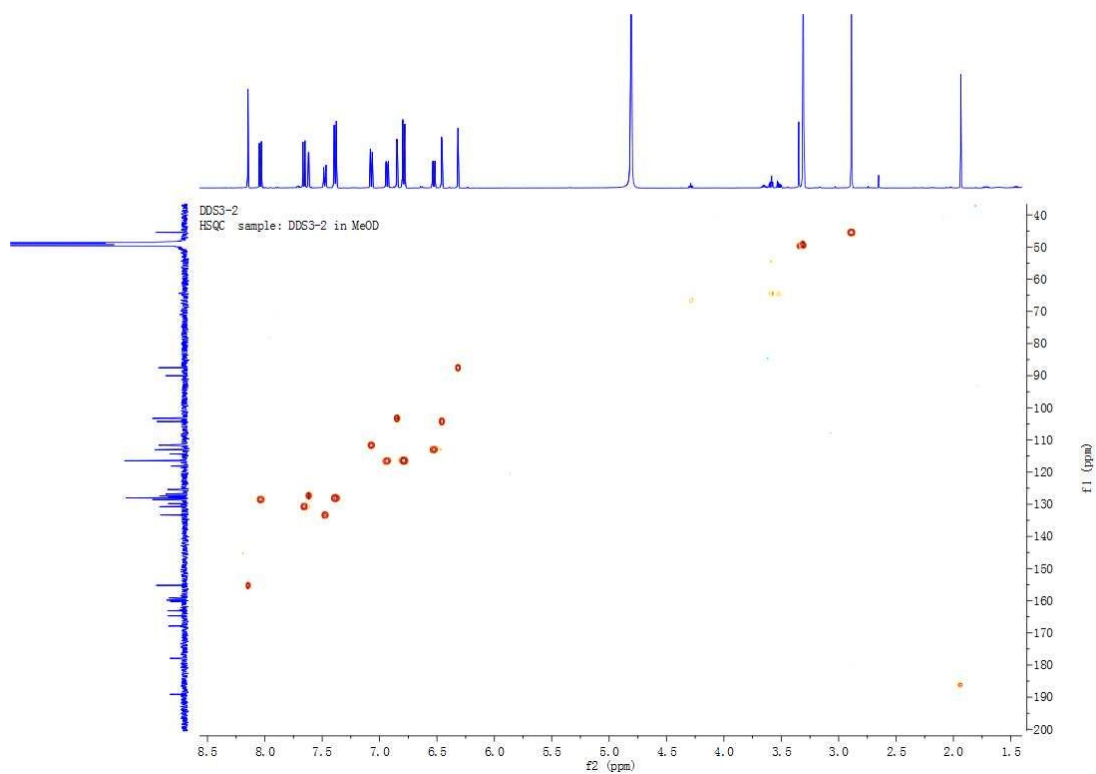

**Figure S21. The HMBC spectrum of 10b**

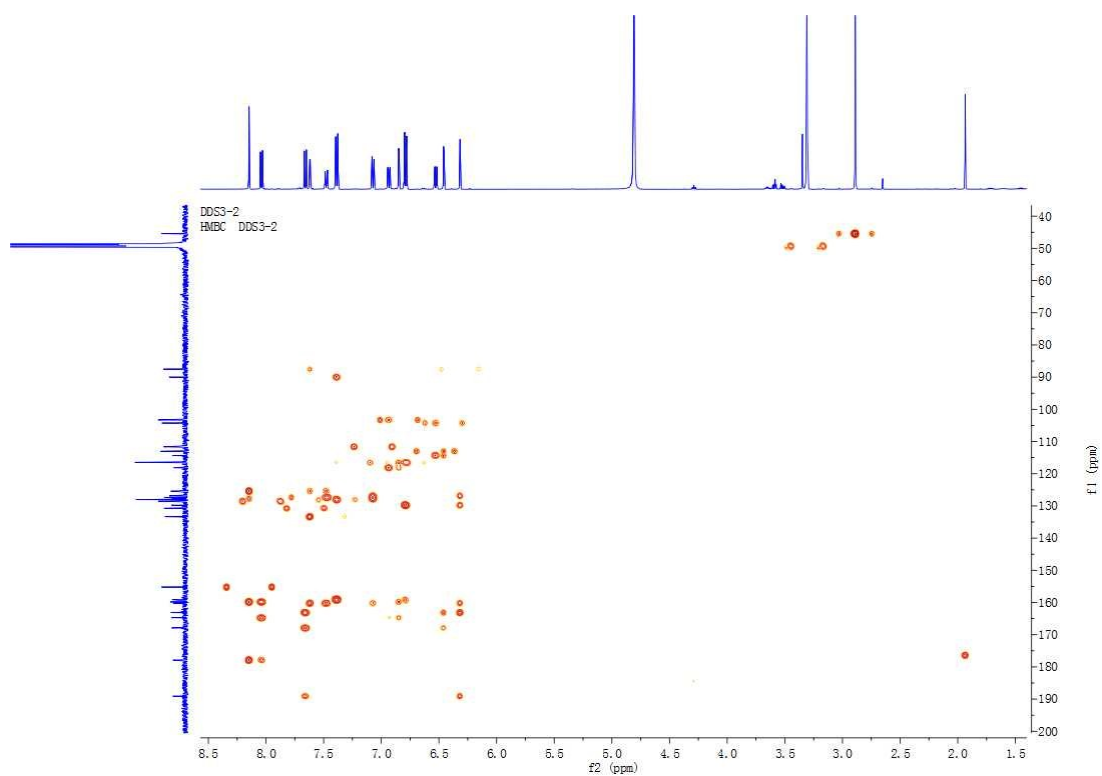

**Figure S22. The  $^1\text{H}$ - $^1\text{H}$  COSY spectrum of 10b**

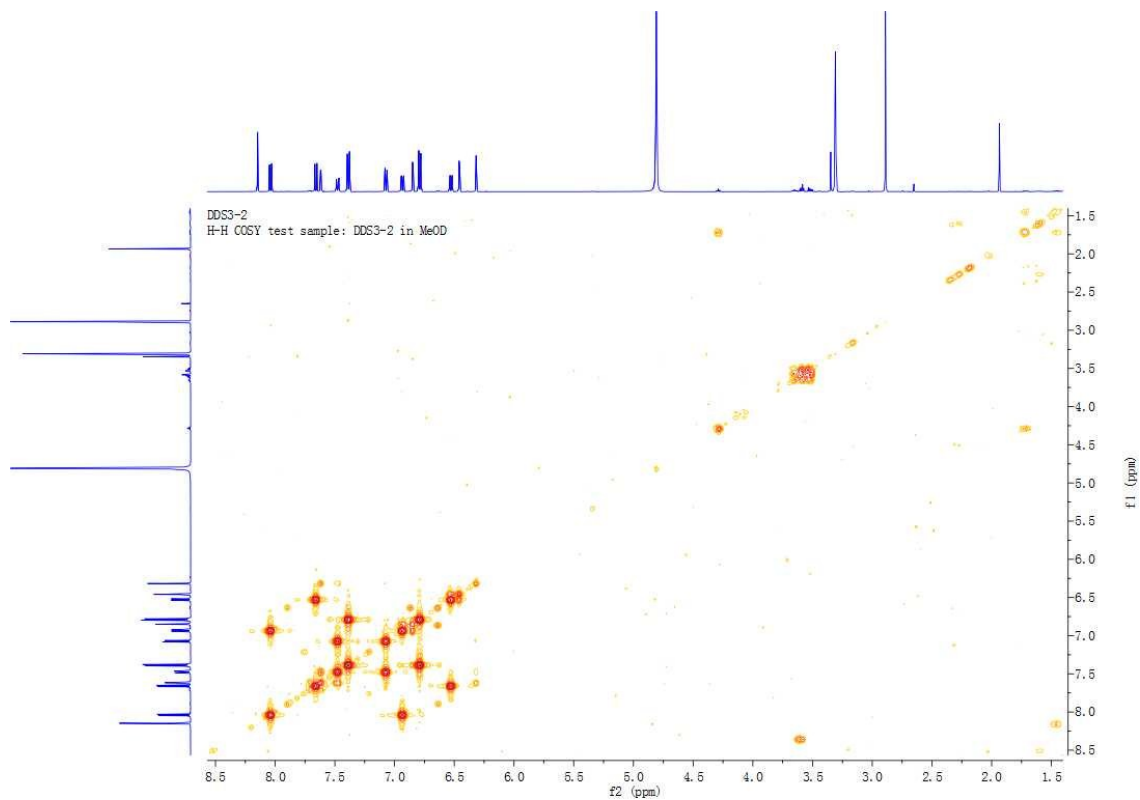



**Figure S23. The NOESY spectrum of 10b**

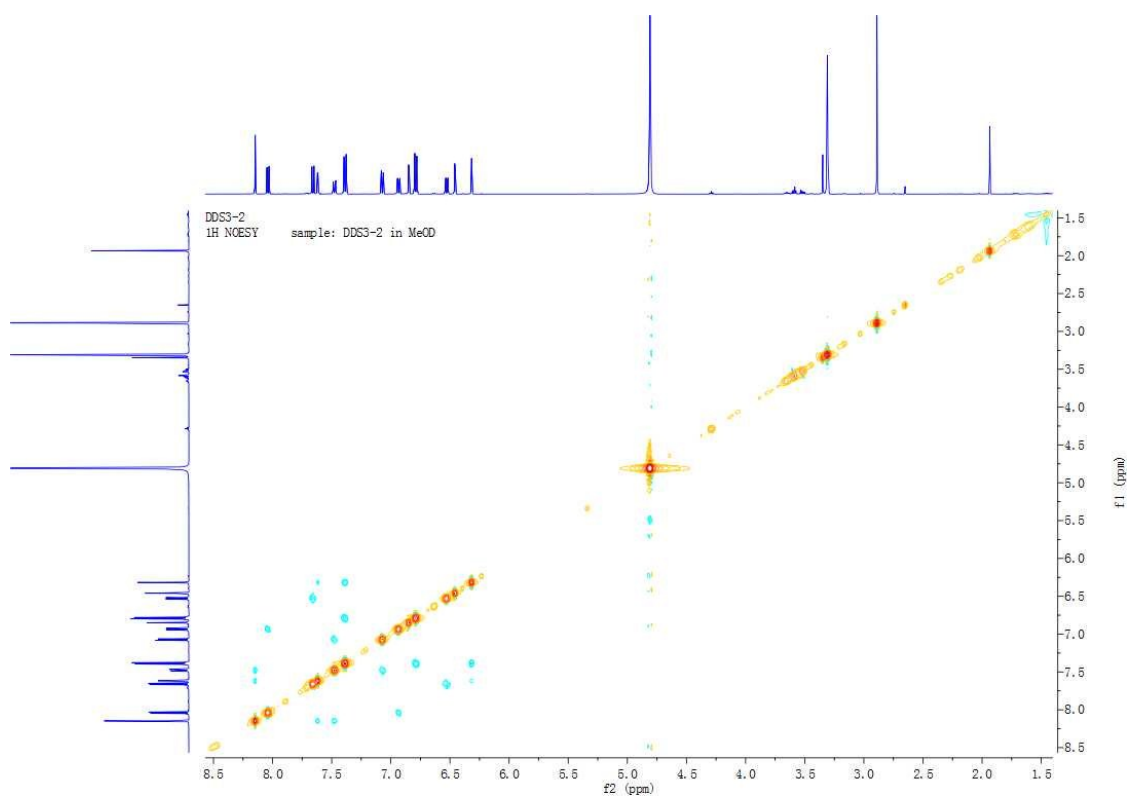

**Figure S24. The  $^1\text{H}$  NMR spectrum of 10c**

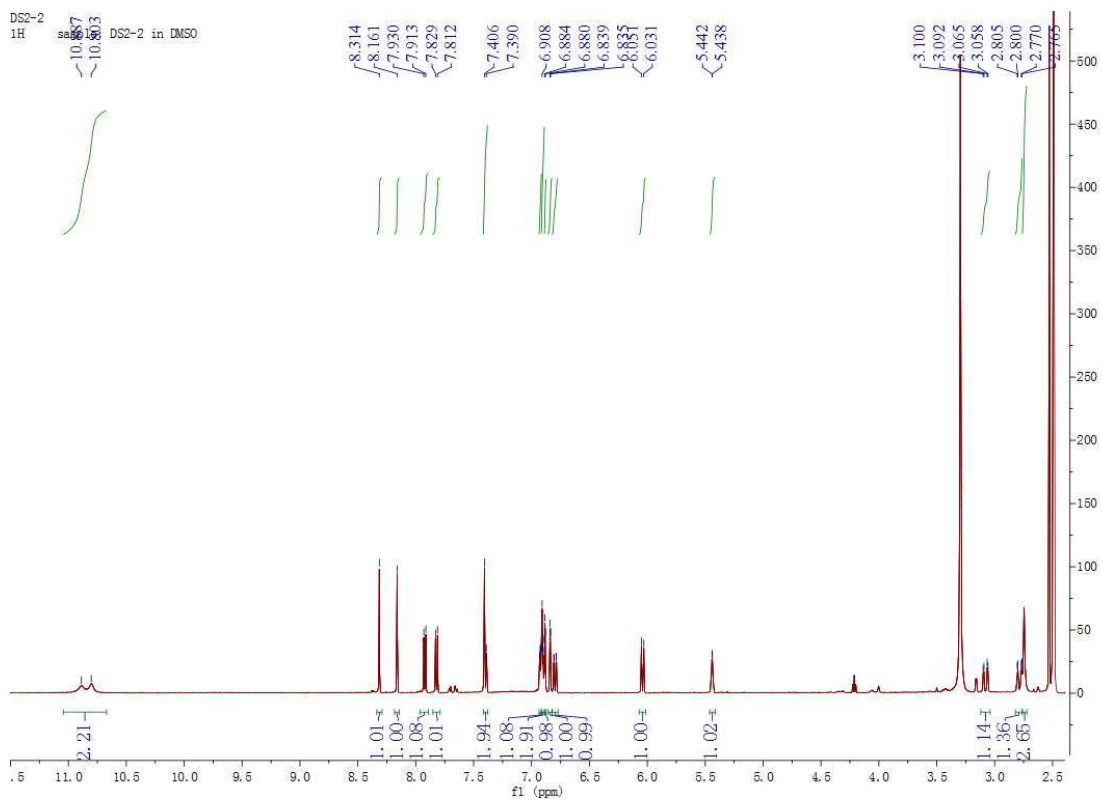

**Figure S25. The  $^{13}\text{C}$  NMR spectrum of 10c**

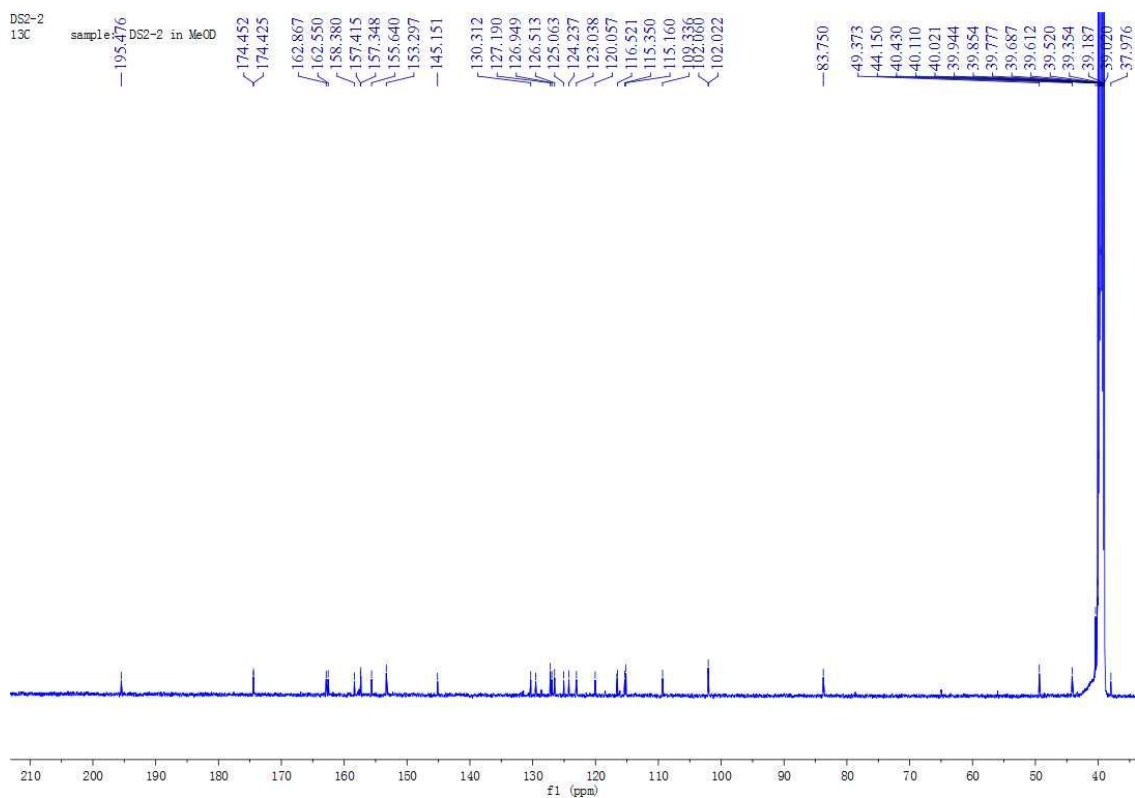

**Figure S26. The HSQC spectrum of 10c**

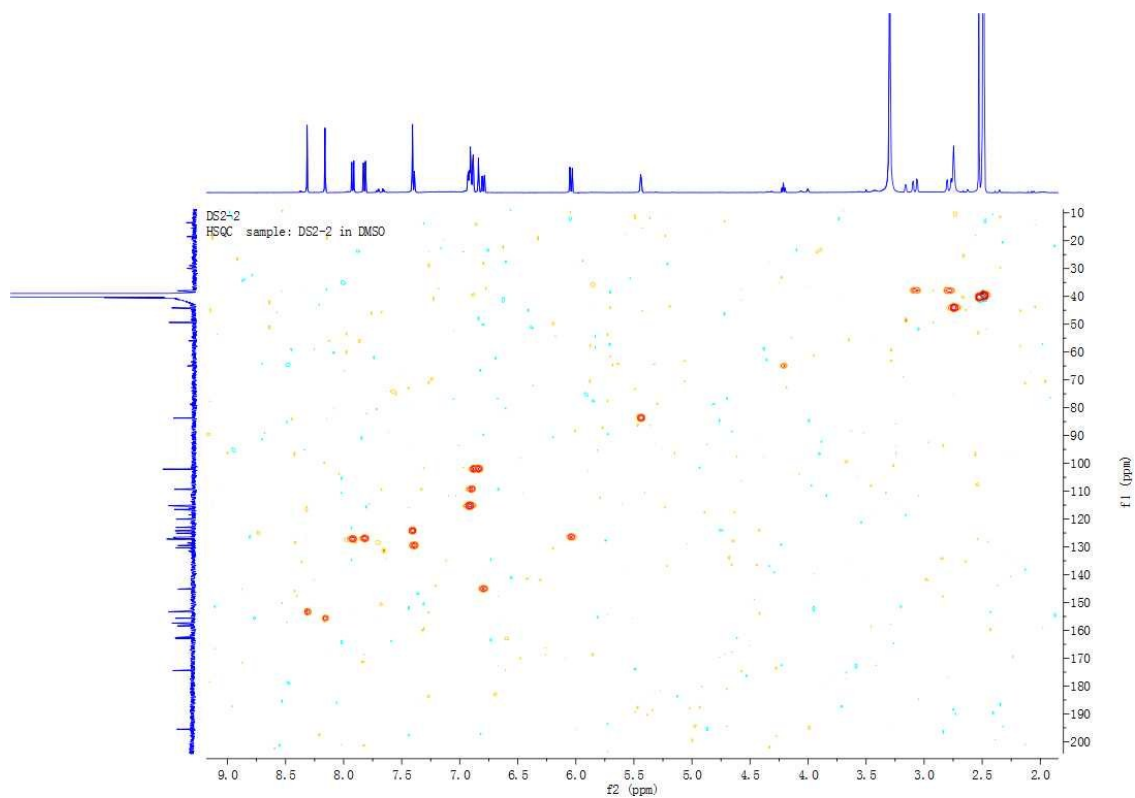

**Figure S27. The HMBC spectrum of 10c**

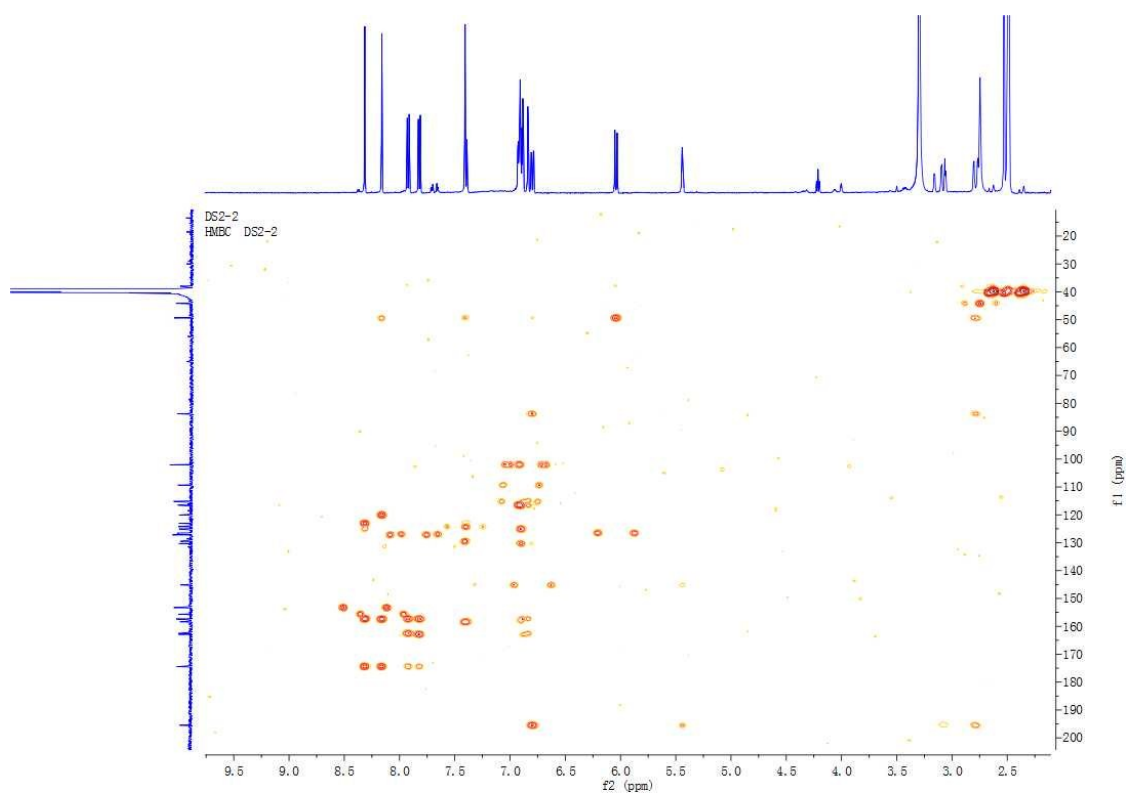

**Figure S28. The  $^1\text{H}$ - $^1\text{H}$  COSY spectrum of 10c**

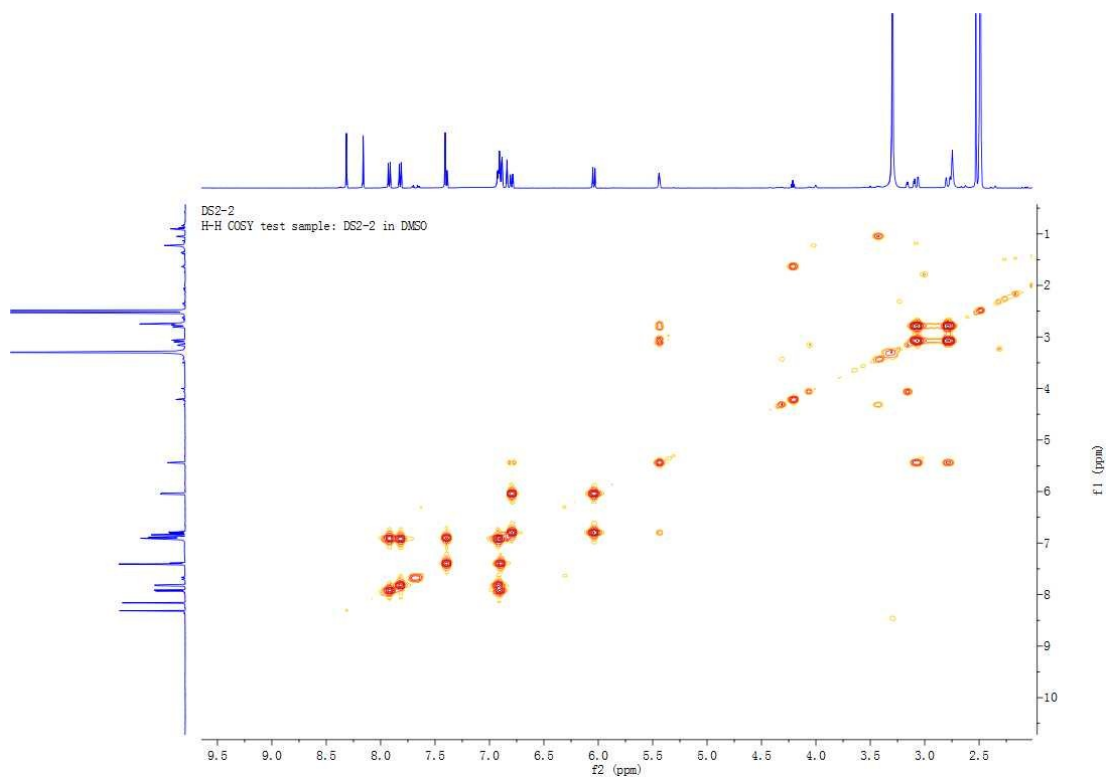

**Figure S29. The NOESY spectrum of 10c**

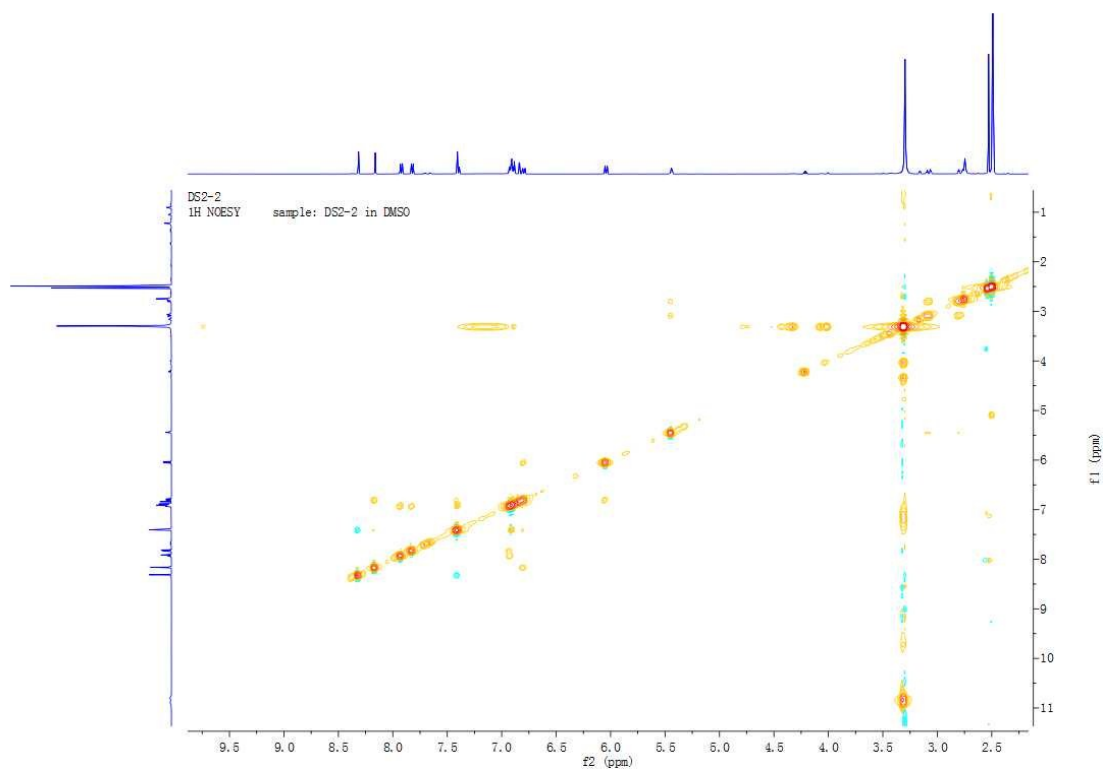

**Figure S30. The HR-MS of 10c.**

20161206-DDS2-2-#9-10 RT: 0.09-0.10 AV: 2 SB: 3 0.96-0.98 NL: 3.55E6  
T: FTMS + p ESI Full ms [150.00-1200.00]

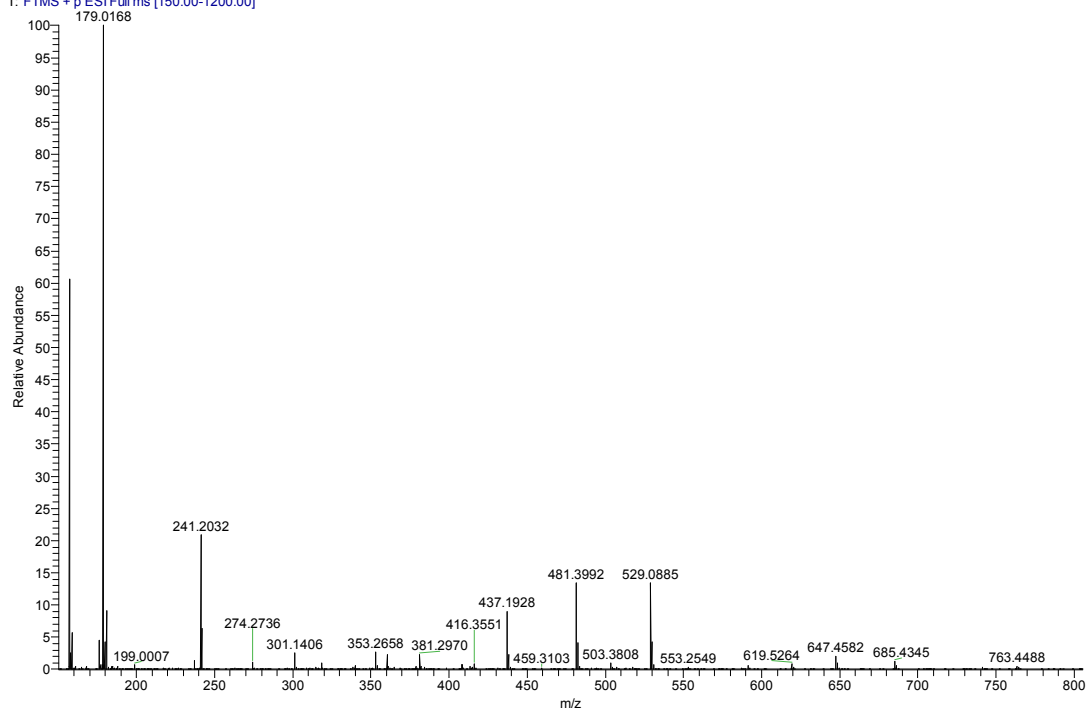

**Figure S31. The  $^1\text{H}$ -NMR spectrum of 12a**

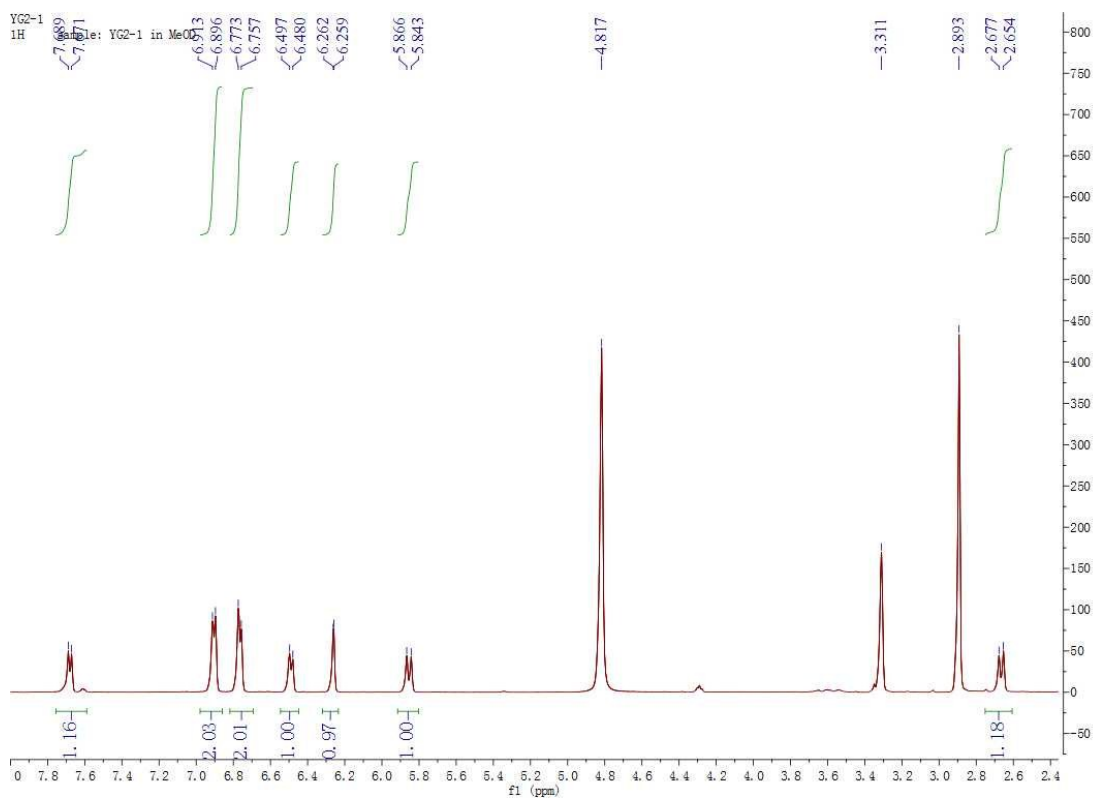

**Figure S32. The  $^{13}\text{C}$  NMR spectrum of 12a**

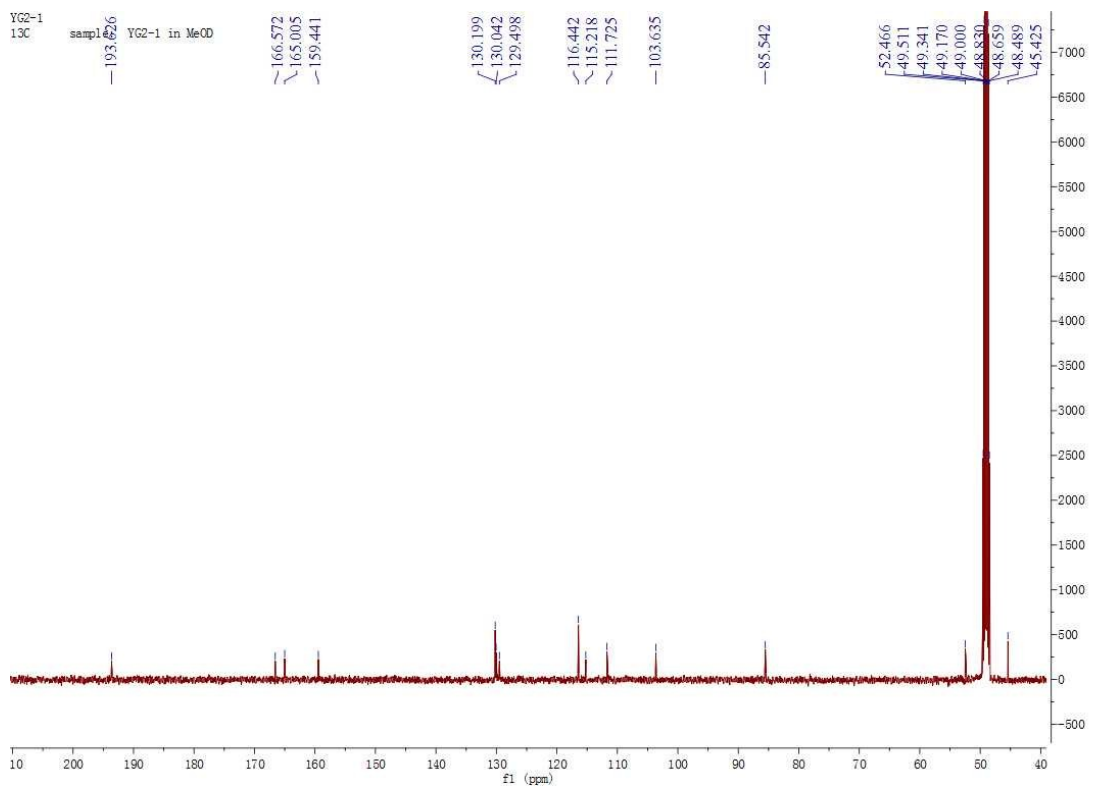

Figure S33. The HR-MS of 12a

20161206-YG2-2 #7-8 RT: 0.06-0.08 AV: 2 SB: 2 0.02-0.03 NL: 2.63E5  
T: FTMS + p ESI Full ms [150.00-1200.00]

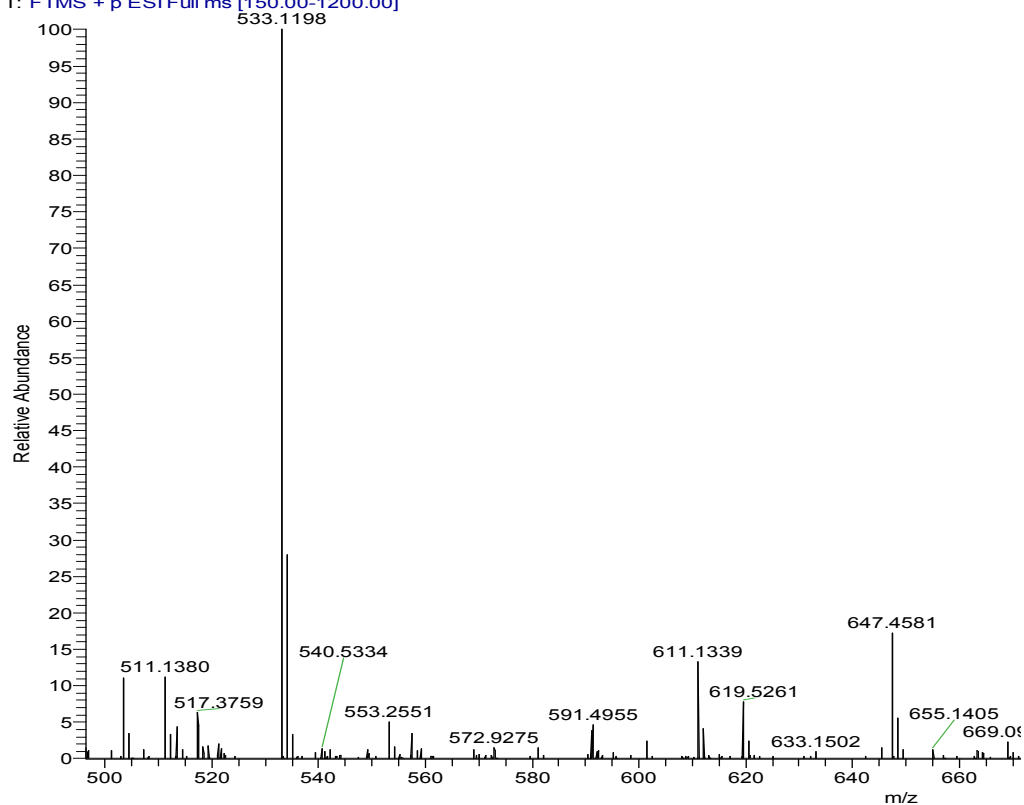

Figure S34. <sup>1</sup>H NMR spectrum of 12b

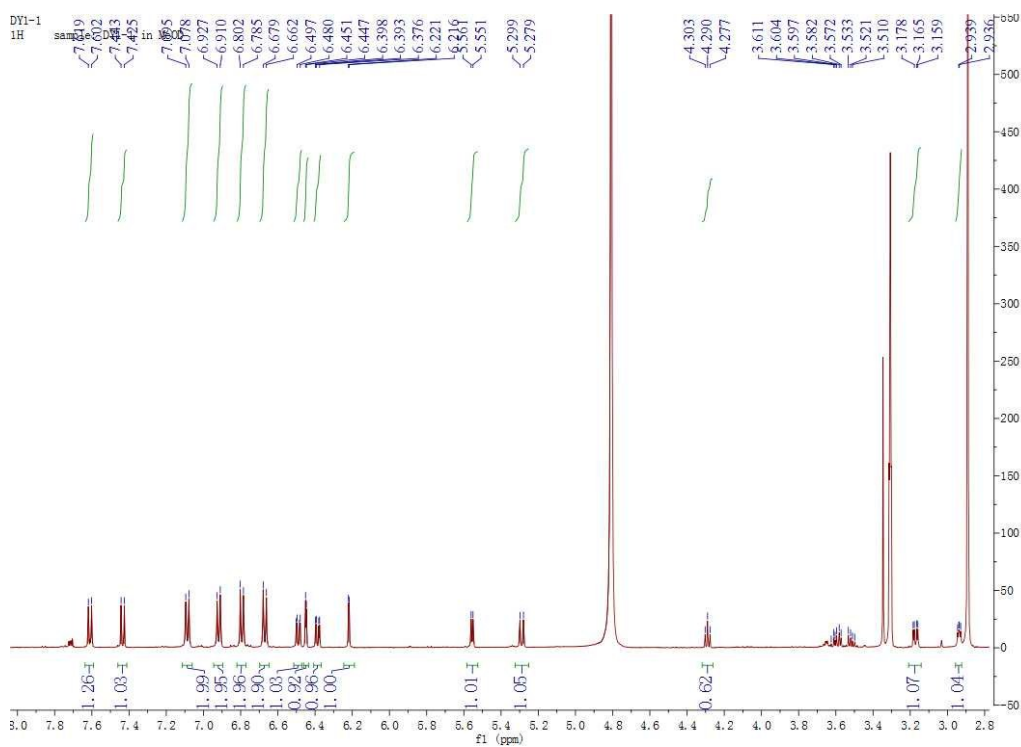

**Figure S35. The  $^{13}\text{C}$  NMR spectrum of 12b**

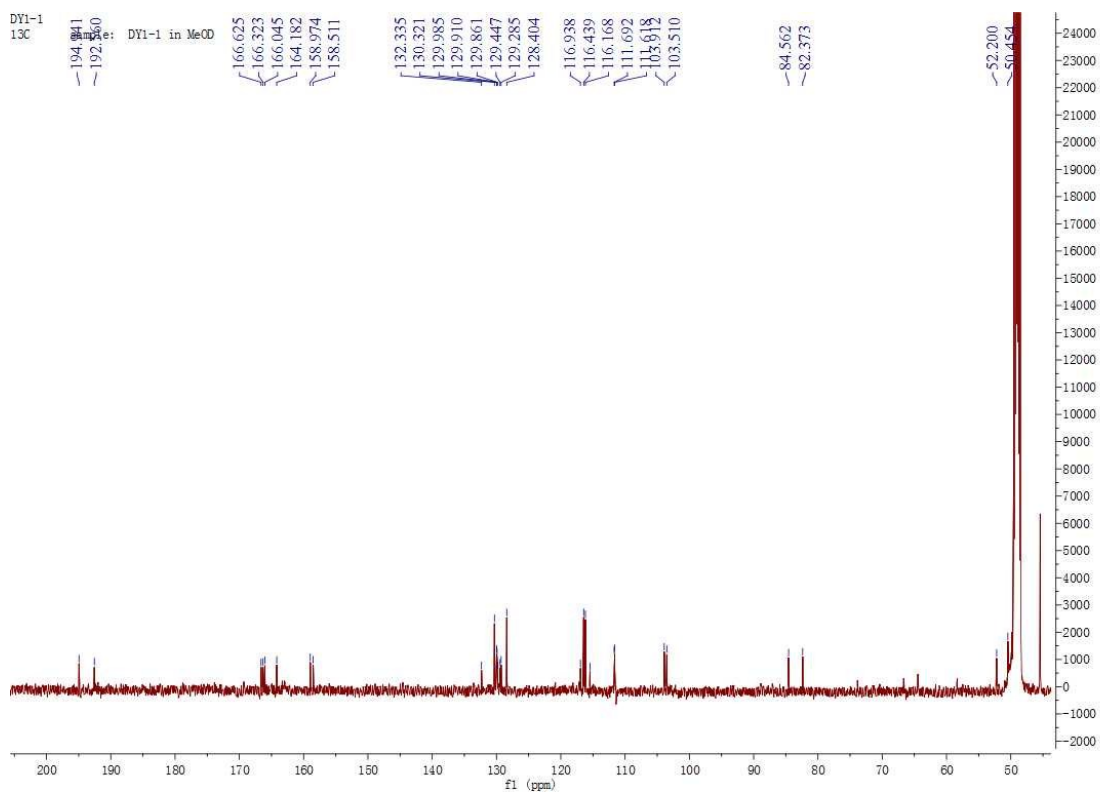

**Figure S36. The HSQC spectrum of 12b**

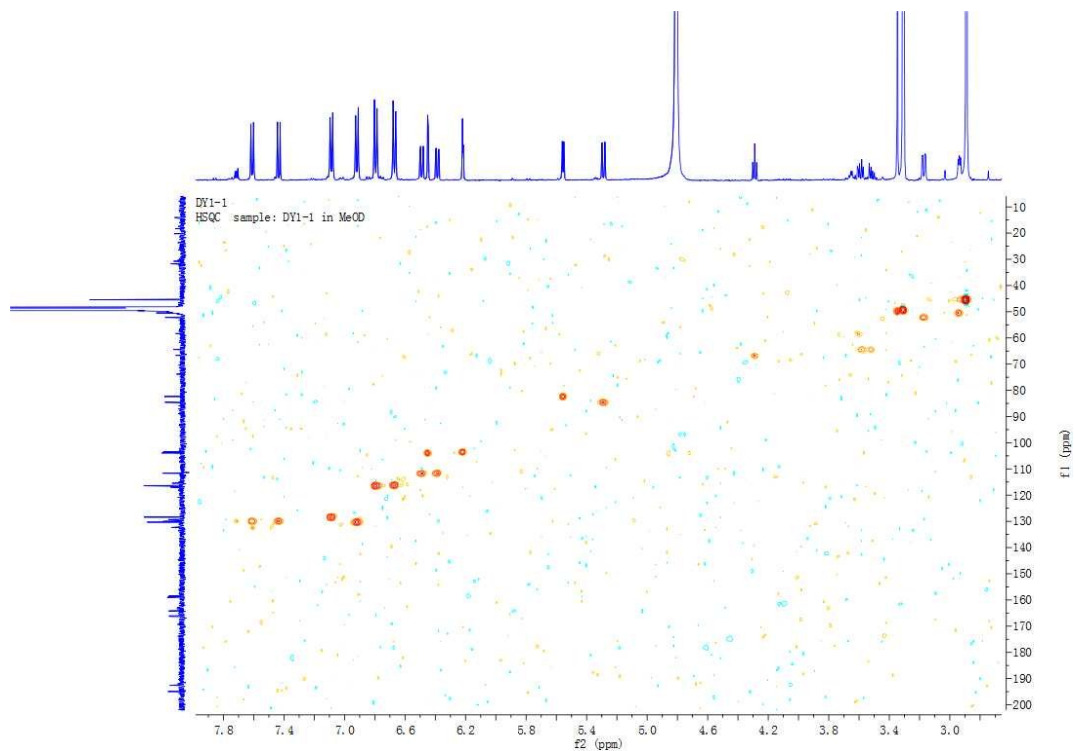

Figure S37. The HMBC spectrum of 12b

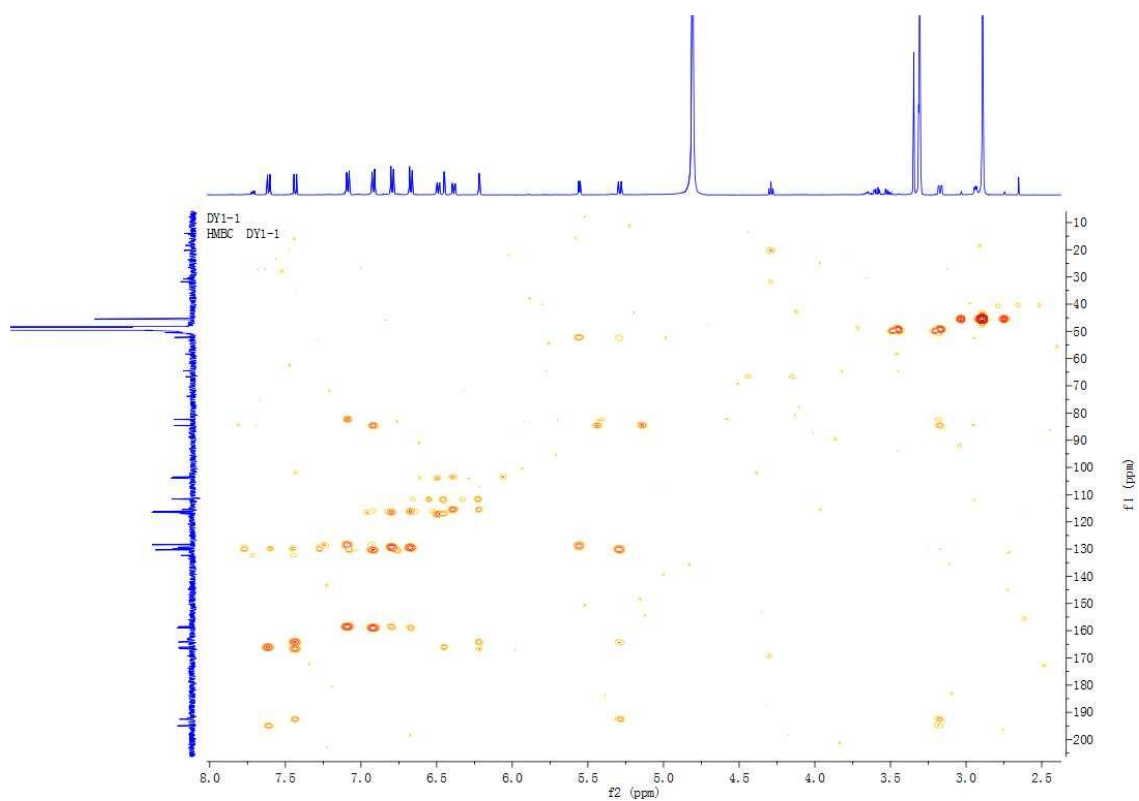

Figure S38. The  $^1\text{H}$ - $^1\text{H}$  COSY spectrum of 12b

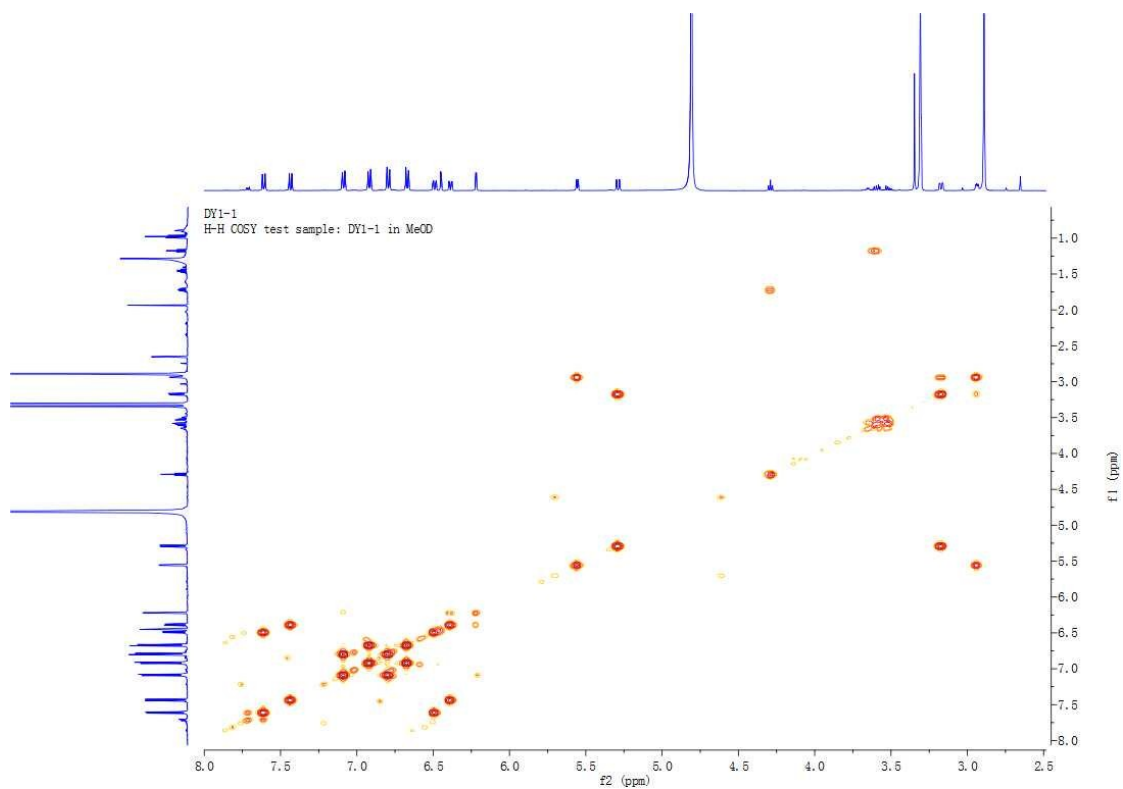



**Figure S39. The NOESY spectrum of 12b**

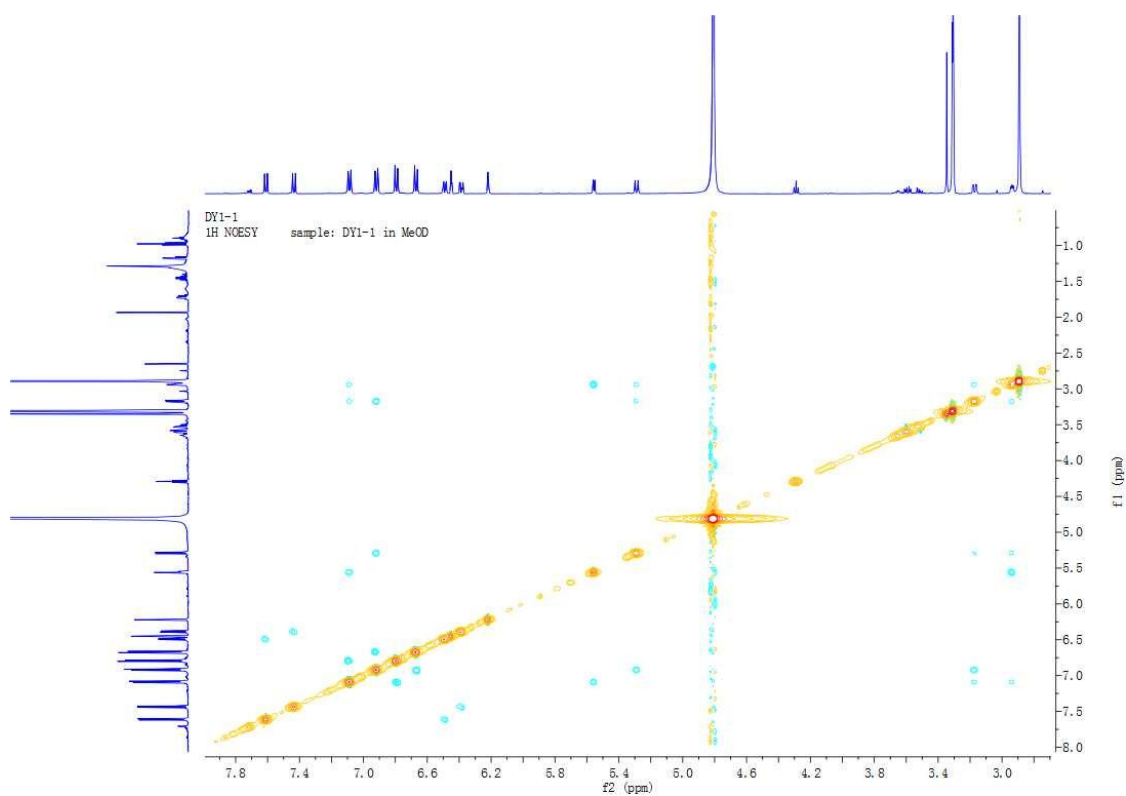

**Figure S40. The HR-MS of 12b**

20161206-DY1-2 #7-8 RT: 0.06-0.08 AV: 2 SB: 3 0  
T: FTMS + p ESI Full ms [150.00-1200.00]

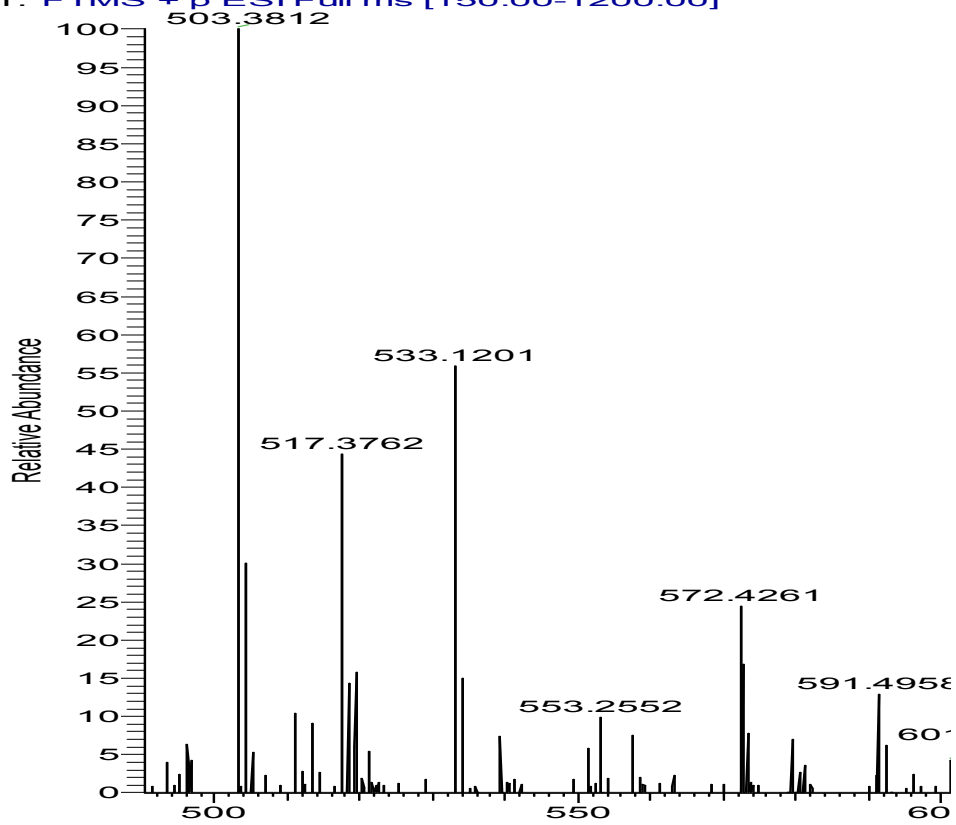

Supplement: c9ra00470j1.pdf [file c9ra00470j1.pdf]
